# Supplementary material for: Bone sarcoma patient-derived xenografts are faithful and stable preclinical models for molecular and therapeutic investigations
Source: PubMed Central journal article supplement (PMC6704066; doi:10.1038/s41598-019-48634-y), 2019-08-21

# **Bone sarcoma patient-derived xenografts are faithful and stable preclinical models for molecular and therapeutic investigations**

Patrizia Nanni, Lorena Landuzzi, Maria Cristina Manara, Alberto Righi, Giordano Nicoletti, Camilla Cristalli, Michela Pasello, Alessandro Parra, Marianna Carrabotta, Manuela Ferracin, Arianna Palladini, Marianna L. Ianzano, Veronica Giusti, Francesca Ruzzi, Mauro Magnani, Davide Maria Donati, Piero Picci, Pier-Luigi Lollini and Katia Scotlandi

## **Description of Supplementary files**

**Supplementary Table 1.** Patients characteristics, PDX and cell cultures

**Supplementary Table 2.** Fusion transcripts and p53 status of EW PDX

**Supplementary Table 3.** List of genes differentially expressed in OS PDX *vs.* clinical sample

**Supplementary Table 4.** Most relevant networks involving the genes that are deregulated in PDX *vs.* primary OS tumors

**Supplementary Table 5.** Enrichment by Pathway Maps.

**Supplementary Figure 1.** Comparison of PDX growth in two immunodeficient mouse strains.

**Supplementary Figure 2.** Unsupervised Principal Component Analysis of OS and EW including clinical samples, PDX and *in vitro* cultures.

Supplementary Table 1. Patients characteristics, PDX and cell cultures

| Specimen code | Patient age (years) | Patient sex | Tumor histotype | Specimen origin (primary tumor / local relapse / distant metastasis*) | Notes         | Multiple specimens from same patient** | Specimen type | Post-chemo therapy | PDX growth | PDX name  | <i>In vitro</i> growth from specimen | <i>In vitro</i> growth from PDX |
|---------------|---------------------|-------------|-----------------|-----------------------------------------------------------------------|---------------|----------------------------------------|---------------|--------------------|------------|-----------|--------------------------------------|---------------------------------|
| R001          | 18                  | M           | OS              | Primary                                                               |               | 1                                      | Biopsy        | NO                 | YES        | PDX-OS#1  | nd                                   | YES                             |
| R002          | 49                  | F           | EW              | Metastasis                                                            |               |                                        | Surgery       | YES                | YES        | PDX-EW#1  | YES                                  | YES                             |
| R003          | 37                  | M           | OS              | Relapse                                                               | Extraskeletal |                                        | Surgery       | NO                 | YES        | PDX-OS#3  | YES                                  | NO                              |
| R004          | 16                  | M           | OS              | Metastasis                                                            |               | 2                                      | Surgery       | YES                | NO         |           | YES                                  | nd                              |
| R005          | 19                  | M           | OS              | Primary                                                               |               |                                        | Surgery       | YES                | NO         |           | NO                                   | nd                              |
| R006          | 11                  | F           | OS              | Primary                                                               |               |                                        | Biopsy        | NO                 | YES        | PDX-OS#4  | YES                                  | YES                             |
| R007          | 20                  | F           | OS              | Metastasis                                                            |               |                                        | Surgery       | YES                | NO         |           | YES                                  | nd                              |
| R008          | 49                  | F           | OS              | Metastasis                                                            |               |                                        | Surgery       | YES                | NO         |           | YES                                  | nd                              |
| R009          | 27                  | M           | OS              | Relapse                                                               |               |                                        | Surgery       | NO                 | NO         |           | YES                                  | nd                              |
| R010          | 8                   | M           | EW              | Primary                                                               |               |                                        | Surgery       | YES                | NO         |           | NO                                   | nd                              |
| R011          | 7                   | F           | EW              | Primary                                                               |               |                                        | Surgery       | YES                | YES        | PDX-EW#6  | YES                                  | YES                             |
| R012          | 43                  | M           | OS              | Primary                                                               |               |                                        | Surgery       | YES                | NO         |           | NO                                   | nd                              |
| R013          | 35                  | M           | OS              | Metastasis                                                            |               |                                        | Surgery       | YES                | NO         |           | NO                                   | nd                              |
| R014          | 38                  | M           | EW              | Relapse                                                               |               |                                        | Surgery       | NO                 | YES        | PDX-EW#2  | YES                                  | YES                             |
| R015          | 68                  | M           | OS              | Relapse                                                               | Extraskeletal |                                        | Surgery       | NO                 | YES        | PDX-OS#5  | NO                                   | NO                              |
| R016          | 52                  | M           | OS              | Metastasis                                                            |               |                                        | Surgery       | YES                | NO         |           | YES                                  | nd                              |
| R017          | 12                  | F           | OS              | Primary                                                               |               |                                        | Surgery       | YES                | YES        | PDX-OS#2  | NO                                   | YES                             |
| R018          | 49                  | F           | OS              | Primary                                                               | Extraskeletal |                                        | Surgery       | YES                | YES        | PDX-OS#6  | YES                                  | YES                             |
| R019          | 38                  | M           | OS              | Relapse                                                               | Extraskeletal |                                        | Surgery       | YES                | YES        | PDX-OS#7  | YES                                  | YES                             |
| R020          | 17                  | M           | OS              | Primary                                                               |               | 3                                      | Biopsy        | NO                 | YES        | PDX-OS#8  | NO                                   | YES                             |
| R021          | 71                  | F           | OS              | Primary                                                               | Extraskeletal |                                        | Surgery       | NO                 | YES        | PDX-OS#9  | NO                                   | YES                             |
| R022          | 49                  | F           | OS              | Primary                                                               |               |                                        | Surgery       | YES                | NO         |           | NO                                   | nd                              |
| R023          | 36                  | F           | OS              | Relapse                                                               | Extraskeletal | 4                                      | Surgery       | NO                 | YES        | PDX-OS#10 | NO                                   | NO                              |
| R024          | 36                  | F           | OS              | Metastasis                                                            |               | 4                                      | Surgery       | YES                | NO         |           | NO                                   | nd                              |
| R025          | 16                  | F           | EW              | Relapse                                                               |               |                                        | Surgery       | YES                | NO         |           | NO                                   | nd                              |
| R026          | 28                  | M           | OS              | Relapse                                                               |               | 7                                      | Surgery       | YES                | NO         |           | NO                                   | nd                              |

|      |    |   |    |            |   |         |     |     |           |     |     |
|------|----|---|----|------------|---|---------|-----|-----|-----------|-----|-----|
| R027 | 7  | M | OS | Primary    |   | Biopsy  | NO  | NO  |           | NO  | nd  |
| R028 | 14 | M | EW | Primary    |   | Surgery | YES | YES | PDX-EW#3  | YES | YES |
| R029 | 45 | M | EW | Metastasis |   | Surgery | NO  | NO  |           | YES | nd  |
| R030 | 24 | M | OS | Metastasis |   | Surgery | YES | NO  |           | NO  | nd  |
| R031 | 17 | M | OS | Primary    | 3 | Surgery | YES | NO  |           | NO  | nd  |
| R032 | 14 | F | EW | Primary    |   | Surgery | YES | NO  |           | NO  | nd  |
| R033 | 14 | M | EW | Primary    |   | Surgery | YES | NO  |           | NO  | nd  |
| R034 | 15 | M | EW | Primary    | 5 | Biopsy  | YES | NO  |           | NO  | nd  |
| R035 | 14 | F | OS | Primary    |   | Surgery | YES | NO  |           | NO  | nd  |
| R036 | 22 | M | OS | Primary    |   | Biopsy  | NO  | YES | PDX-OS#11 | NO  | YES |
| R037 | 13 | M | EW | Primary    |   | Surgery | NO  | NO  |           | YES | nd  |
| R038 | 43 | F | OS | Metastasis |   | Surgery | YES | YES | PDX-OS#14 | NO  | YES |
| R039 | 26 | M | EW | Metastasis |   | Surgery | YES | NO  |           | NO  | nd  |
| R040 | 17 | M | OS | Metastasis | 2 | Surgery | YES | NO  |           | nd  | nd  |
| R041 | 12 | M | EW | Primary    | 6 | Biopsy  | NO  | NO  |           | NO  | nd  |
| R042 | 13 | M | EW | Primary    |   | Biopsy  | NO  | NO  |           | NO  | nd  |
| R043 | 11 | M | EW | Primary    |   | Biopsy  | NO  | NO  |           | NO  | nd  |
| R044 | 17 | M | OS | Metastasis | 2 | Surgery | YES | NO  |           | NO  | nd  |
| R045 | 27 | F | OS | Primary    |   | Surgery | NO  | NO  |           | NO  | nd  |
| R046 | 28 | M | OS | Metastasis | 7 | Surgery | YES | YES | PDX-OS#15 | nd  | YES |
| R047 | 10 | F | OS | Primary    |   | Biopsy  | NO  | NO  |           | NO  | nd  |
| R048 | 26 | M | OS | Metastasis |   | Surgery | YES | NO  |           | NO  | nd  |
| R049 | 51 | F | OS | Metastasis |   | Surgery | YES | NO  |           | NO  | nd  |
| R050 | 18 | F | OS | Metastasis |   | Surgery | YES | NO  |           | nd  | nd  |
| R051 | 15 | M | EW | Primary    | 5 | Surgery | YES | NO  |           | NO  | nd  |
| R052 | 19 | M | OS | Metastasis | 1 | Surgery | YES | NO  |           | NO  | nd  |
| R053 | 11 | M | EW | Primary    | 6 | Surgery | YES | NO  |           | nd  | nd  |
| R054 | 10 | F | OS | Metastasis | 8 | Surgery | YES | YES | PDX-OS#16 | nd  | YES |
| R055 | 36 | F | OS | Metastasis |   | Surgery | YES | YES | PDX-OS#17 | NO  | NO  |
| R056 | 9  | M | EW | Primary    |   | Surgery | YES | NO  |           | NO  | nd  |
| R057 | 21 | M | EW | Primary    |   | Surgery | YES | NO  |           | YES | nd  |
| R058 | 44 | M | EW | Metastasis |   | Surgery | YES | NO  |           | NO  | nd  |
| R059 | 17 | M | OS | Primary    |   | Surgery | NO  | NO  |           | NO  | nd  |
| R060 | 50 | F | OS | Primary    |   | Surgery | YES | NO  |           | NO  | nd  |

|      |    |   |    |            |   |         |     |     |           |     |     |
|------|----|---|----|------------|---|---------|-----|-----|-----------|-----|-----|
| R061 | 5  | F | OS | Primary    |   | Biopsy  | NO  | YES | PDX-OS#21 | YES | YES |
| R062 | 10 | F | OS | Metastasis | 8 | Surgery | YES | YES | PDX-OS#18 | NO  | NO  |
| R063 | 17 | F | EW | Primary    |   | Surgery | YES | YES | PDX-EW#4  | YES | YES |
| R064 | 21 | M | OS | Primary    |   | Surgery | YES | NO  |           | nd  | nd  |
| R065 | 55 | M | OS | Metastasis |   | Surgery | YES | NO  |           | NO  | nd  |
| R066 | 30 | M | OS | Metastasis |   | Surgery | NO  | YES | PDX-OS#19 | NO  | YES |
| R067 | 20 | M | OS | Primary    |   | Biopsy  | NO  | NO  |           | NO  | nd  |
| R068 | 11 | F | OS | Primary    |   | Surgery | YES | NO  |           | NO  | nd  |
| R069 | 8  | M | OS | Primary    |   | Surgery | YES | NO  |           | NO  | nd  |
| R070 | 21 | M | EW | Primary    |   | Biopsy  | NO  | NO  |           | YES | nd  |
| R071 | 15 | M | EW | Primary    |   | Surgery | YES | NO  |           | NO  | nd  |
| R072 | 11 | F | OS | Primary    | 9 | Biopsy  | NO  | NO  |           | nd  | nd  |
| R073 | 25 | M | EW | Primary    |   | Surgery | YES | YES | PDX-EW#5  | YES | YES |
| R074 | 5  | F | OS | Primary    |   | Surgery | YES | NO  |           | NO  | nd  |
| R075 | 18 | M | OS | Primary    |   | Surgery | YES | NO  |           | nd  | nd  |
| R076 | 13 | F | EW | Primary    |   | Surgery | NO  | NO  |           | NO  | nd  |
| R077 | 11 | F | OS | Primary    |   | Surgery | YES | NO  |           | nd  | nd  |
| R078 | 20 | M | OS | Metastasis |   | Surgery | YES | YES | PDX-OS#20 | YES | NO  |
| R079 | 12 | F | OS | Primary    |   | Biopsy  | NO  | NO  |           | nd  | nd  |
| R080 | 15 | M | OS | Primary    |   | Surgery | YES | YES | PDX-OS#12 | YES | NO  |
| R081 | 13 | M | OS | Primary    |   | Biopsy  | NO  | YES | PDX-OS#13 | YES | YES |
| R082 | 15 | M | OS | Metastasis |   | Surgery | YES | NO  |           | nd  | nd  |
| R083 | 11 | F | OS | Primary    | 9 | Surgery | YES | NO  |           | NO  | nd  |
| R084 | 16 | M | EW | Primary    |   | Biopsy  | NO  | NO  |           | nd  | nd  |
| R085 | 18 | M | OS | Metastasis | 2 | Surgery | YES | YES | PDX-OS#23 | nd  | YES |
| R086 | 10 | F | OS | Relapse    |   | Biopsy  | YES | NO  |           | nd  | nd  |
| R087 | 39 | M | EW | Primary    |   | Surgery | YES | NO  |           | nd  | nd  |
| R088 | 20 | M | OS | Primary    |   | Surgery | YES | NO  |           | nd  | nd  |
| R089 | 14 | F | EW | Primary    |   | Surgery | NO  | NO  |           | NO  | nd  |
| R090 | 2  | M | EW | Primary    |   | Surgery | YES | YES | PDX-EW#7  | YES | YES |

\*All metastatic specimens were from lung metastases, except R029, from a bone metastasis

\*\*Identical numbers denote multiple specimens from the same patient

nd, not done

**Supplementary Table 2. Fusion transcripts and p53 status of EW PDX**

| PDX<br>name | Fusion transcript     |                       | p53 status      |                 |
|-------------|-----------------------|-----------------------|-----------------|-----------------|
|             | Patient               | PDX*                  | Patient         | PDX*            |
| EW#1        | EWS-FLI1 Type 1       | EWS-FLI1 Type 1       | Wild-type       | Wild-type       |
| EW#2        | EWS-FLI1 complex type | EWS-FLI1 complex type | Wild-type       | Wild-type       |
| EW#3        | EWS-ERG               | EWS- ERG              | Wild-type       | Wild-type       |
| EW#4        | EWS-FLI1 Type 1       | EWS-FLI1 Type 1       | Wild-type       | Wild-type       |
| EW#5        | EWS-FLI1 Type 2       | EWS-FLI1 Type 2       | Wild-type       | Wild-type       |
| EW#6        | EWS-FLI1 Type 1       | EWS-FLI1 Type 1       | nd <sup>†</sup> | nd <sup>†</sup> |

\*First *in vivo* passage

<sup>†</sup>nd, not done

### Supplementary Table 3. List of genes differentially expressed in OS PDX *vs.* clinical sample

# Notes : Created from Advanced Analysis operation: significance Analysis.

#Entitylist : Fold change >= 2.0 OS

#Interpretation : Tumor - Group OS

#Experiment: Sarcomas and PDX - quantile

#corrected p-value cut-off:0.05

#Fold change cut-off:2.0

#Selected Test : Moderated T-Test

#p-value computation: Asymptotic

#Multiple Testing Correction: Benjamini-Hochberg

# Technology : Agilent.SingleColor.72363

# Owner : gxuser

# Created On : Fri Oct 21 17:05:18 CEST 2016

| ProbeName      | Fold change | Regulation | p (Corr) | p         | [OS, OS-PRI] (normalized) | [OS, OS-PDX1] (normalized) | [OS, OS-PDX6] (normalized) | GeneSymbol | Description                                                                                                              | GenbankAccession |
|----------------|-------------|------------|----------|-----------|---------------------------|----------------------------|----------------------------|------------|--------------------------------------------------------------------------------------------------------------------------|------------------|
| A_23_P204847   | -32.827225  | down       | 3.41E-02 | 2.655E-03 | 9.442151                  | 4.40533                    | 2.1022692                  | LCP1       | Homo sapiens lymphocyte cytosolic protein 1 (L-plastin) (LCP1), mRNA [NM_002298]                                         | NM_002298        |
| A_33_P3364811  | -17.480547  | down       | 1.17E-02 | 3.494E-04 | 5.9815836                 | 1.8539052                  | 1.8470192                  | PTPRC      | Homo sapiens protein tyrosine phosphatase, receptor type, C (PTPRC), transcript variant 1, mRNA [NM_002838]              | NM_002838        |
| A_24_P32935    | -3.6771917  | down       | 4.70E-02 | 4.444E-03 | 6.6413274                 | 4.762723                   | 3.5856256                  | FOLR2      | Homo sapiens folate receptor 2 (fetal) (FOLR2), transcript variant 1, mRNA [NM_000803]                                   | NM_000803        |
| A_24_P50245    | -6.324459   | down       | 3.41E-02 | 2.642E-03 | 8.16873                   | 5.5077877                  | 4.8993483                  | HLA-DMA    | Homo sapiens major histocompatibility complex, class II, DM alpha (HLA-DMA), mRNA [NM_006120]                            | NM_006120        |
| A_33_P3286157  | -4.418821   | down       | 3.09E-02 | 2.127E-03 | 9.246864                  | 7.103203                   | 7.12125                    | TNFRSF4    | Homo sapiens tumor necrosis factor receptor superfamily, member 4 (TNFRSF4), mRNA [NM_003327]                            | NM_003327        |
| A_23_P161076   | -38.950096  | down       | 8.77E-03 | 2.280E-04 | 7.199453                  | 1.9158978                  | 1.7511885                  | CD2        | Homo sapiens CD2 molecule (CD2), mRNA [NM_001767]                                                                        | NM_001767        |
| A_33_P3215768  | -24.098427  | down       | 7.79E-03 | 1.867E-04 | 6.9264827                 | 2.3356159                  | 2.8915195                  | GALNT6     | Homo sapiens polypeptide N-acetylgalactosaminyltransferase 6 (GALNT6), mRNA [NM_007210]                                  | NM_007210        |
| A_24_P937325   | -3.6299024  | down       | 4.39E-02 | 3.836E-03 | 3.6232808                 | 1.76335                    | 1.782822                   | FGD4       | FYVE, RhoGEF and PH domain containing 4 [Source:HGNC Symbol;Acc:HGNC:19125] [ENST00000472289]                            | AL713762         |
| A_23_P324813   | -7.8121295  | down       | 2.55E-02 | 1.569E-03 | 7.460657                  | 4.494941                   | 4.8674817                  | BCL6B      | Homo sapiens B-cell CLL/lymphoma 6, member B (BCL6B), mRNA [NM_181844]                                                   | NM_181844        |
| A_19_P00317360 | -5.8997593  | down       | 1.61E-03 | 1.194E-05 | 4.367965                  | 1.807309                   | 1.8436997                  | ATP2C1     | Homo sapiens ATPase, Ca++ transporting, type 2C, member 1 (ATP2C1), transcript variant 8, mRNA [NM_001199182]            | NM_001199182     |
| A_23_P111132   | -5.0537076  | down       | 1.61E-02 | 6.463E-04 | 12.6707945                | 10.333452                  | 10.73757                   | HSPA1A     | Homo sapiens heat shock 70kDa protein 1A (HSPA1A), mRNA [NM_005345]                                                      | NM_005345        |
| A_23_P102000   | -18.995161  | down       | 1.93E-02 | 8.982E-04 | 10.495874                 | 6.2483144                  | 2.584436                   | CXCR4      | Homo sapiens chemokine (C-X-C motif) receptor 4 (CXCR4), transcript variant 1, mRNA [NM_001008540]                       | NM_001008540     |
| A_23_P346093   | -7.2225404  | down       | 3.20E-02 | 2.364E-03 | 6.2370424                 | 3.384536                   | 4.8317556                  | TMC8       | Homo sapiens transmembrane channel-like 8 (TMC8), mRNA [NM_152468]                                                       | NM_152468        |
| A_24_P153568   | -22.611359  | down       | 4.00E-02 | 3.355E-03 | 7.9167542                 | 3.4177783                  | 1.8121264                  | MPEG1      | Homo sapiens macrophage expressed 1 (MPEG1), mRNA [NM_001039396]                                                         | NM_001039396     |
| A_24_P237443   | -14.832554  | down       | 2.31E-03 | 2.707E-05 | 5.6262846                 | 1.7355895                  | 1.7281557                  | SASH3      | Homo sapiens SAM and SH3 domain containing 3 (SASH3), mRNA [NM_018990]                                                   | NM_018990        |
| A_33_P3296181  | -3.749955   | down       | 2.32E-02 | 1.256E-03 | 5.513463                  | 3.6065898                  | 3.6167006                  | CCL3L3     | Homo sapiens chemokine (C-C motif) ligand 3-like 3 (CCL3L3), mRNA [NM_001001437]                                         | NM_001001437     |
| A_32_P356316   | -40.149208  | down       | 2.25E-02 | 1.160E-03 | 8.290367                  | 2.9630675                  | 1.7372084                  | HLA-DOA    | Homo sapiens major histocompatibility complex, class II, DO alpha (HLA-DOA), mRNA [NM_002119]                            | NM_002119        |
| A_33_P3369393  | -7.871324   | down       | 2.32E-02 | 1.272E-03 | 7.5205135                 | 4.543907                   | 4.50961                    | NCF1       | Homo sapiens neutrophil cytosolic factor 1 (NCF1), mRNA [NM_000265]                                                      | NM_000265        |
| A_23_P3014     | -27.93256   | down       | 1.81E-03 | 1.893E-05 | 6.8613033                 | 2.0574276                  | 1.9349339                  | RNASE6     | Homo sapiens ribonuclease, RNase A family, k6 (RNASE6), mRNA [NM_005615]                                                 | NM_005615        |
| A_24_P40551    | -9.3017435  | down       | 3.99E-03 | 6.810E-05 | 5.21972                   | 2.0022187                  | 1.788909                   | BEX4       | Homo sapiens brain expressed, X-linked 4 (BEX4), transcript variant 2, mRNA [NM_001080425]                               | NM_001080425     |
| A_24_P319364   | -52.32558   | down       | 3.75E-03 | 6.123E-05 | 7.938652                  | 2.2292075                  | 1.7852266                  | F11R       | Homo sapiens F11 receptor (F11R), mRNA [NM_016946]                                                                       | NM_016946        |
| A_23_P7313     | -45.404552  | down       | 7.85E-03 | 1.933E-04 | 12.508218                 | 7.003453                   | 2.767918                   | SPP1       | Homo sapiens secreted phosphoprotein 1 (SPP1), transcript variant 1, mRNA [NM_001040058]                                 | NM_001040058     |
| A_33_P3365432  | -11.647932  | down       | 1.92E-02 | 8.899E-04 | 6.2003665                 | 2.6583645                  | 2.4588814                  | NCF4       | Homo sapiens neutrophil cytosolic factor 4, 40kDa (NCF4), transcript variant 1, mRNA [NM_000631]                         | NM_000631        |
| A_33_P3229402  | -24.10832   | down       | 1.91E-02 | 8.769E-04 | 6.8765974                 | 2.285138                   | 2.3170085                  | PECAM1     | Homo sapiens platelet/endothelial cell adhesion molecule 1 (PECAM1), mRNA [NM_000442]                                    | NM_000442        |
| A_23_P85240    | -12.127025  | down       | 1.97E-02 | 9.289E-04 | 5.912547                  | 2.3123934                  | 2.0178282                  | TLR7       | Homo sapiens toll-like receptor 7 (TLR7), mRNA [NM_016562]                                                               | NM_016562        |
| A_23_P91414    | -13.814562  | down       | 6.52E-03 | 1.446E-04 | 5.592788                  | 1.8046703                  | 2.1999748                  | CCM2L      | Homo sapiens cerebral cavernous malformation 2-like (CCM2L), mRNA [NM_080625]                                            | NM_080625        |
| A_23_P10506    | -21.835701  | down       | 2.17E-02 | 1.089E-03 | 7.068879                  | 2.6202621                  | 1.8327141                  | HPGDS      | Homo sapiens hematopoietic prostaglandin D synthase (HPGDS), mRNA [NM_014485]                                            | NM_014485        |
| A_23_P166297   | -8.040049   | down       | 3.49E-02 | 2.752E-03 | 6.352495                  | 3.345291                   | 3.0164967                  | ABCG1      | Homo sapiens ATP-binding cassette, sub-family G (WHITE), member 1 (ABCG1), transcript variant 5, mRNA [NM_207627]        | NM_207627        |
| A_23_P121480   | -12.75118   | down       | 5.69E-03 | 1.176E-04 | 6.256212                  | 2.5836535                  | 2.0513625                  | CD200      | Homo sapiens CD200 molecule (CD200), transcript variant 2, mRNA [NM_001004196]                                           | NM_001004196     |
| A_32_P181077   | -17.802723  | down       | 3.59E-03 | 5.496E-05 | 6.2487783                 | 2.0947526                  | 1.9579582                  | DOCK8      | Homo sapiens dedicator of cytokinesis 8 (DOCK8), transcript variant 1, mRNA [NM_203447]                                  | NM_203447        |
| A_23_P21495    | -5.4419465  | down       | 1.93E-02 | 9.049E-04 | 9.956417                  | 7.5122943                  | 5.0542536                  | FCGBP      | Homo sapiens Fc fragment of IgG binding protein (FCGBP), mRNA [NM_003890]                                                | NM_003890        |
| A_33_P3424217  | -29.82521   | down       | 2.47E-03 | 3.259E-05 | 7.602979                  | 2.704519                   | 1.8369366                  | HLA-DQB1   | Homo sapiens major histocompatibility complex, class II, DQ beta 1 (HLA-DQB1), transcript variant 3, mRNA [NM_001243962] | NM_001243962     |
| A_33_P3218975  | -11.902355  | down       | 7.84E-03 | 1.899E-04 | 5.5534506                 | 1.9802754                  | 1.741519                   | ENTPD1     | Homo sapiens ectonucleoside triphosphate diphosphohydrolase 1 (ENTPD1), transcript variant 1, mRNA [NM_001776]           | NM_001776        |
| A_23_P110791   | -22.033161  | down       | 3.33E-02 | 2.501E-03 | 11.546739                 | 7.085134                   | 6.916711                   | CSF1R      | Homo sapiens colony stimulating factor 1 receptor (CSF1R), transcript variant 1, mRNA [NM_005211]                        | NM_005211        |
| A_23_P203376   | -6.4948006  | down       | 4.71E-02 | 4.506E-03 | 4.5579133                 | 1.858628                   | 1.8354985                  | MS4A6A     | Homo sapiens membrane-spanning 4-domains, subfamily A, member 6A (MS4A6A), transcript variant 1, mRNA [NM_152852]        | NM_152852        |
| A_33_P3215948  | -34.317272  | down       | 1.21E-02 | 3.849E-04 | 7.9412894                 | 2.8404264                  | 2.5889754                  | MPZL2      | Homo sapiens myelin protein zero-like 2 (MPZL2), transcript variant 1, mRNA [NM_005797]                                  | NM_005797        |

|                |            |      |          |           |           |           |           |              |                                                                                                                                              |              |
|----------------|------------|------|----------|-----------|-----------|-----------|-----------|--------------|----------------------------------------------------------------------------------------------------------------------------------------------|--------------|
| A_33_P3412438  | -3.5580637 | down | 3.99E-02 | 3.306E-03 | 6.25051   | 4.419418  | 5.4471207 |              |                                                                                                                                              |              |
| A_22_P00007787 | -2.1363099 | down | 4.47E-02 | 4.084E-03 | 3.3242722 | 2.2291512 | 3.2977633 | LOC101928445 | Homo sapiens uncharacterized LOC101928445 (LOC101928445), long non-coding RNA [NR_110560]                                                    | NR_110560    |
| A_33_P3215883  | -21.79865  | down | 2.33E-02 | 1.329E-03 | 6.541357  | 2.0951903 | 1.7966506 | FLT1         | Homo sapiens frns-related tyrosine kinase 1 (FLT1), transcript variant 1, mRNA [NM_002019]                                                   | NM_002019    |
| A_33_P3316273  | -39.538372 | down | 3.53E-02 | 2.788E-03 | 10.692498 | 5.3873167 | 1.9101012 | CCL3         | Homo sapiens chemokine (C-C motif) ligand 3 (CCL3), mRNA [NM_002983]                                                                         | NM_002983    |
| A_22_P00001150 | -4.9014506 | down | 4.89E-02 | 4.823E-03 | 4.603488  | 2.3102791 | 2.3225336 | PCED1B-AS1   | Homo sapiens PCED1B antisense RNA 1 (PCED1B-AS1), long non-coding RNA [NR_026544]                                                            | NR_026544    |
| A_24_P339944   | -10.955846 | down | 4.04E-02 | 3.397E-03 | 6.828881  | 3.3752518 | 4.0652614 | PDGFB        | Homo sapiens platelet-derived growth factor beta polypeptide (PDGFB), transcript variant 1, mRNA [NM_002608]                                 | NM_002608    |
| A_23_P145631   | -26.285011 | down | 1.61E-03 | 1.159E-05 | 6.9543705 | 2.2382019 | 1.774046  | GIMAP6       | Homo sapiens GTPase, IMAP family member 6 (GIMAP6), transcript variant 1, mRNA [NM_024711]                                                   | NM_024711    |
| A_24_P224727   | -9.088336  | down | 4.57E-02 | 4.276E-03 | 7.388281  | 4.2042646 | 5.330721  | CEBPA        | Homo sapiens CCAAT/enhancer binding protein (C/EBP), alpha (CEBPA), transcript variant 1, mRNA [NM_004364]                                   | NM_004364    |
| A_23_P203173   | -65.764755 | down | 7.85E-03 | 1.943E-04 | 9.004591  | 2.9653485 | 1.7895797 | IL10RA       | Homo sapiens interleukin 10 receptor, alpha (IL10RA), transcript variant 1, mRNA [NM_001558]                                                 | NM_001558    |
| A_33_P3312466  | -10.745551 | down | 4.52E-02 | 4.162E-03 | 5.5664673 | 2.1407998 | 1.9421599 | BTNL9        | Homo sapiens butyrophilin-like 9 (BTNL9), mRNA [NM_152547]                                                                                   | NM_152547    |
| A_33_P3285540  | -111.41531 | down | 1.22E-02 | 3.966E-04 | 9.50794   | 2.7081363 | 4.126291  | CLDN5        | Homo sapiens claudin 5 (CLDN5), transcript variant 1, mRNA [NM_001130861]                                                                    | NM_001130861 |
| A_23_P252471   | -33.280064 | down | 4.99E-02 | 5.055E-03 | 9.95705   | 4.900464  | 4.586234  | PECAM1       | Homo sapiens platelet/endothelial cell adhesion molecule 1 (PECAM1), mRNA [NM_000442]                                                        | NM_000442    |
| A_23_P118025   | -9.382408  | down | 1.57E-03 | 1.007E-05 | 5.080383  | 1.8504245 | 1.8267515 | DPEP2        | Homo sapiens dipeptidase 2 (DPEP2), mRNA [NM_022355]                                                                                         | NM_022355    |
| A_23_P135990   | -15.135195 | down | 1.46E-02 | 5.669E-04 | 5.800604  | 1.8807685 | 2.2454143 | SLCO2A1      | Homo sapiens solute carrier organic anion transporter family, member 2A1 (SLCO2A1), mRNA [NM_005630]                                         | NM_005630    |
| A_24_P406132   | -5.1868215 | down | 4.73E-02 | 4.531E-03 | 5.5795565 | 3.2047057 | 3.9753354 | MAPK13       | Homo sapiens mitogen-activated protein kinase 13 (MAPK13), transcript variant 1, mRNA [NM_002754]                                            | NM_002754    |
| A_23_P73429    | -20.232304 | down | 2.36E-02 | 1.378E-03 | 10.076151 | 5.737562  | 8.502817  | HCLS1        | Homo sapiens hematopoietic cell-specific Lyn substrate 1 (HCLS1), transcript variant 1, mRNA [NM_005335]                                     | NM_005335    |
| A_23_P216340   | -5.8616786 | down | 3.98E-02 | 3.288E-03 | 8.536206  | 5.9848924 | 5.526022  | SLA          | Homo sapiens Src-like adaptor (SLA), transcript variant 1, mRNA [NM_001045556]                                                               | NM_001045556 |
| A_23_P427023   | -27.40517  | down | 1.23E-02 | 4.050E-04 | 7.2497663 | 2.47339   | 2.6647005 | GIMAP1       | Homo sapiens GTPase, IMAP family member 1 (GIMAP1), mRNA [NM_130759]                                                                         | NM_130759    |
| A_33_P3352098  | -10.211405 | down | 2.51E-02 | 1.538E-03 | 8.9233465 | 5.571237  | 4.872101  | MS4A7        | Homo sapiens membrane-spanning 4-domains, subfamily A, member 7 (MS4A7), transcript variant 1, mRNA [NM_021201]                              | NM_021201    |
| A_23_P340019   | -10.67047  | down | 6.15E-03 | 1.333E-04 | 5.3805275 | 1.9649756 | 1.7867563 | NLR3         | Homo sapiens NLR family, CARD domain containing 3 (NLR3), transcript variant 1, mRNA [NM_178844]                                             | NM_178844    |
| A_22_P00005437 | -5.7419763 | down | 4.71E-02 | 4.487E-03 | 4.4812818 | 1.9597344 | 2.834795  | lnc-DUOX2-2  | LNCipedia lincRNA (lnc-DUOX2-2), lincRNA [lnc-DUOX2-2:1]                                                                                     |              |
| A_23_P90626    | -19.090994 | down | 1.25E-02 | 4.166E-04 | 6.081032  | 1.8262115 | 1.8083856 | CYTIP        | Homo sapiens cytohesin 1 interacting protein (CYTIP), mRNA [NM_004288]                                                                       | NM_004288    |
| A_23_P33723    | -35.007713 | down | 3.15E-02 | 2.242E-03 | 9.475334  | 4.345733  | 3.4004138 | CD163        | Homo sapiens CD163 molecule (CD163), transcript variant 1, mRNA [NM_004244]                                                                  | NM_004244    |
| A_23_P368711   | -4.390435  | down | 3.71E-03 | 5.867E-05 | 5.1489315 | 3.0145676 | 3.2850416 | LILRA6       | Homo sapiens leukocyte immunoglobulin-like receptor, subfamily A (with TM domain), member 6 (LILRA6), transcript variant 1, mRNA [NM_024318] | NM_024318    |
| A_33_P3212232  | -9.21279   | down | 5.29E-03 | 1.061E-04 | 5.500349  | 2.296711  | 2.4431298 | MPEG1        | Homo sapiens macrophage expressed 1 (MPEG1), mRNA [NM_001039396]                                                                             | NM_001039396 |
| A_23_P86283    | -18.427406 | down | 1.17E-02 | 3.455E-04 | 8.366631  | 4.1628494 | 3.8952055 | LAPTM5       | Homo sapiens lysosomal protein transmembrane 5 (LAPTM5), mRNA [NM_006762]                                                                    | NM_006762    |
| A_23_P11201    | -11.857812 | down | 3.56E-02 | 2.819E-03 | 5.755698  | 2.1879323 | 2.6044235 | GPR34        | Homo sapiens G protein-coupled receptor 34 (GPR34), transcript variant 4, mRNA [NM_001097579]                                                | NM_001097579 |
| A_23_P85800    | -60.256935 | down | 1.28E-02 | 4.444E-04 | 9.51067   | 3.5976145 | 1.9960341 | CD52         | Homo sapiens CD52 molecule (CD52), mRNA [NM_001803]                                                                                          | NM_001803    |
| A_33_P3309556  | -5.0198975 | down | 4.74E-02 | 4.554E-03 | 5.0274205 | 2.6997626 | 2.8177948 | PTPRE        | Homo sapiens protein tyrosine phosphatase, receptor type, E (PTPRE), transcript variant 1, mRNA [NM_006504]                                  | NM_006504    |
| A_23_P47034    | -6.230628  | down | 1.46E-02 | 5.683E-04 | 5.1008277 | 2.46145   | 4.9880705 | HHEX         | Homo sapiens hematopoietically expressed homeobox (HHEX), mRNA [NM_002729]                                                                   | NM_002729    |
| A_23_P82775    | -35.308437 | down | 1.62E-02 | 6.675E-04 | 7.070899  | 1.9289582 | 1.8604704 | SOX17        | Homo sapiens SRY (sex determining region Y)-box 17 (SOX17), mRNA [NM_022454]                                                                 | NM_022454    |
| A_33_P3273884  | -16.116735 | down | 3.33E-02 | 2.515E-03 | 6.284051  | 2.2735631 | 1.7338192 | HLA-DQA1     | Homo sapiens major histocompatibility complex, class II, DQ alpha 1 (HLA-DQA1), mRNA [NM_002122]                                             | NM_002122    |
| A_24_P120251   | -15.607418 | down | 1.26E-02 | 4.246E-04 | 5.9952555 | 2.0310955 | 1.8941857 | TMSF18       | Homo sapiens transmembrane 4 L six family member 18 (TMSF18), transcript variant 1, mRNA [NM_138786]                                         | NM_138786    |
| A_33_P3284508  | -14.992103 | down | 1.15E-02 | 3.383E-04 | 12.427656 | 8.521525  | 8.733506  | CD14         | Homo sapiens CD14 molecule (CD14), transcript variant 3, mRNA [NM_001174104]                                                                 | NM_001174104 |
| A_24_P215653   | -15.963263 | down | 1.20E-02 | 3.748E-04 | 6.5014515 | 2.504768  | 2.5678906 | CLEC14A      | Homo sapiens C-type lectin domain family 14, member A (CLEC14A), mRNA [NM_175060]                                                            | NM_175060    |
| A_23_P63371    | -3.126287  | down | 4.53E-02 | 4.202E-03 | 3.780581  | 2.1361308 | 2.5088134 | TAL1         | Homo sapiens T-cell acute lymphocytic leukemia 1 (TAL1), transcript variant 1, mRNA [NM_003189]                                              | NM_003189    |
| A_24_P340128   | -30.798923 | down | 1.08E-03 | 3.292E-06 | 6.6979113 | 1.7531031 | 2.1640775 | P2RY8        | Homo sapiens purinergic receptor P2Y, G-protein coupled, 8 (P2RY8), mRNA [NM_178129]                                                         | NM_178129    |
| A_33_P3409062  | -26.833282 | down | 1.79E-02 | 8.031E-04 | 12.342063 | 7.5961113 | 5.576063  | TYROBP       | Homo sapiens TYRO protein tyrosine kinase binding protein (TYROBP), transcript variant 1, mRNA [NM_003332]                                   | NM_003332    |
| A_33_P3218980  | -7.995942  | down | 3.09E-02 | 2.155E-03 | 5.120029  | 2.120761  | 1.7354077 | ENTPD1       | Homo sapiens ectionucleoside triphosphate diphosphohydrolase 1 (ENTPD1), transcript variant 1, mRNA [NM_001776]                              | NM_001776    |
| A_23_P38959    | -21.37979  | down | 1.74E-03 | 1.479E-05 | 7.0462889 | 2.628113  | 1.7360837 | VAV1         | Homo sapiens vav 1 guanine nucleotide exchange factor (VAV1), transcript variant 1, mRNA [NM_005428]                                         | NM_005428    |
| A_24_P365767   | -48.22627  | down | 2.32E-02 | 1.279E-03 | 8.587856  | 2.9961088 | 2.293069  | CYBB         | Homo sapiens cytochrome b-245, beta polypeptide (CYBB), mRNA [NM_000397]                                                                     | NM_000397    |
| A_33_P3248265  | -13.368791 | down | 2.91E-02 | 1.982E-03 | 5.6318483 | 1.8910512 | 3.0493646 | LTB          | Homo sapiens lymphotxin beta (TNF superfamily, member 3) (LTB), transcript variant 1, mRNA [NM_002341]                                       | NM_002341    |
| A_24_P944253   | -7.781011  | down | 1.28E-03 | 6.149E-06 | 4.822876  | 1.8629185 | 1.7340091 | KLHL6        | Homo sapiens kelch-like family member 6 (KLHL6), mRNA [NM_130446]                                                                            | NM_130446    |
| A_24_P12397    | -13.526044 | down | 3.38E-02 | 2.571E-03 | 5.7231894 | 1.9655215 | 1.7461956 | TREM2        | Homo sapiens triggering receptor expressed on myeloid cells 2 (TREM2), transcript variant 1, mRNA [NM_018965]                                | NM_018965    |
| A_23_P36120    | -54.779446 | down | 2.79E-03 | 3.980E-05 | 7.5967197 | 1.8211569 | 2.2601695 | MS4A6A       | Homo sapiens membrane-spanning 4-domains, subfamily A, member 6A (MS4A6A), transcript variant 2, mRNA [NM_022349]                            | NM_022349    |
| A_24_P362193   | -7.40628   | down | 4.47E-02 | 3.993E-03 | 4.959797  | 2.0710478 | 1.9313121 | CD84         | Homo sapiens CD84 molecule (CD84), transcript variant 2, mRNA [NM_003874]                                                                    | NM_003874    |
| A_22_P00002164 | -4.391826  | down | 1.18E-02 | 3.599E-04 | 3.8775008 | 1.7426797 | 1.7382627 | RPS6KA2-IT1  | Homo sapiens RPS6KA2 intronic transcript 1 (non-protein coding) (RPS6KA2-IT1), long non-coding RNA [NR_046793]                               | NR_046793    |
| A_23_P47709    | -21.116518 | down | 3.18E-02 | 2.326E-03 | 9.583854  | 5.1835587 | 4.561588  | FOLR2        | Homo sapiens folate receptor 2 (fetal) (FOLR2), transcript variant 1, mRNA [NM_000803]                                                       | NM_000803    |
| A_19_P00315824 | -8.496442  | down | 4.84E-02 | 4.742E-03 | 9.754044  | 6.667185  | 6.7312202 | PCAT19       | Homo sapiens prostate cancer associated transcript 19 (non-protein coding) (PCAT19), long non-coding RNA [NR_040109]                         | NR_040109    |
| A_23_P423309   | -9.667998  | down | 4.41E-02 | 3.884E-03 | 5.121935  | 1.8487177 | 2.5800195 | PCDH12       | Homo sapiens protocadherin 12 (PCDH12), mRNA [NM_016580]                                                                                     | NM_016580    |
| A_23_P76538    | -10.971784 | down | 2.39E-02 | 1.404E-03 | 8.746446  | 5.2907195 | 3.4690785 | TESC         | Homo sapiens tescalcin (TESC), transcript variant 1, mRNA [NM_017899]                                                                        | NM_017899    |
| A_23_P29005    | -8.046399  | down | 4.16E-02 | 3.567E-03 | 5.0134416 | 2.0050983 | 1.8488333 | SAMSN1       | Homo sapiens SAM domain, SH3 domain and nuclear localization signals 1 (SAMSN1), transcript variant 1, mRNA [NM_022136]                      | NM_022136    |
| A_24_P209455   | -56.957382 | down | 1.12E-03 | 3.819E-06 | 7.881413  | 2.0496023 | 1.9635624 | GIMAP4       | Homo sapiens GTPase, IMAP family member 4 (GIMAP4), mRNA [NM_018326]                                                                         | NM_018326    |

|                |            |      |          |           |           |           |           |                       |                                                                                                                                                           |              |
|----------------|------------|------|----------|-----------|-----------|-----------|-----------|-----------------------|-----------------------------------------------------------------------------------------------------------------------------------------------------------|--------------|
| A_23_P137931   | -6.0947237 | down | 4.84E-02 | 4.703E-03 | 4.413346  | 1.805785  | 1.7906271 | ADORA3                | Homo sapiens adenosine A3 receptor (ADORA3), transcript variant A, mRNA [NM_000677]                                                                       | NM_000677    |
| A_23_P56328    | -25.20382  | down | 1.62E-02 | 6.677E-04 | 8.544329  | 3.8887582 | 3.2549138 | PLVAP                 | plasmalemma vesicle associated protein [Source:HGNC Symbol;Acc:HGNC:13635] [ENST00000252590]                                                              | AK096030     |
| A_23_P19650    | -4.191767  | down | 2.26E-02 | 1.172E-03 | 3.797865  | 1.7303064 | 1.7227244 | VIP                   | Homo sapiens vasoactive intestinal peptide (VIP), transcript variant 1, mRNA [NM_003381]                                                                  | NM_003381    |
| A_23_P17481    | -9.178282  | down | 2.78E-02 | 1.788E-03 | 5.188873  | 1.9906487 | 2.0975652 | SIGLEC1               | Homo sapiens sialic acid binding Ig-like lectin 1, sialoadhesin (SIGLEC1), mRNA [NM_023068]                                                               | NM_023068    |
| A_24_P943301   | -4.525474  | down | 4.57E-02 | 4.281E-03 | 4.9588227 | 2.7807539 | 2.7690248 | PEAR1                 | Homo sapiens platelet endothelial aggregation receptor 1 (PEAR1), mRNA [NM_001080471]                                                                     | NM_001080471 |
| A_33_P3347452  | -11.474197 | down | 2.02E-02 | 9.708E-04 | 8.077066  | 4.556745  | 3.3713844 | RP56KA2               | Homo sapiens ribosomal protein S6 kinase, 90kDa, polypeptide 2 (RP56KA2), transcript variant 1, mRNA [NM_021135]                                          | NM_021135    |
| A_23_P3643     | -3.3867774 | down | 4.84E-02 | 4.736E-03 | 3.8007047 | 2.0407915 | 3.1672273 | DNASE1L2              | Homo sapiens deoxyribonuclease I-like 2 (DNASE1L2), transcript variant 1, mRNA [NM_001374]                                                                | NM_001374    |
| A_33_P3415430  | -4.5098205 | down | 3.49E-02 | 2.743E-03 | 12.360315 | 10.187245 | 10.90069  | HSPA1B                | Homo sapiens heat shock 70kDa protein 1B (HSPA1B), mRNA [NM_005346]                                                                                       | NM_005346    |
| A_23_P142447   | -6.816549  | down | 3.98E-03 | 6.703E-05 | 8.379015  | 5.6099734 | 5.663677  | MYO1F                 | Homo sapiens myosin IF (MYO1F), mRNA [NM_012335]                                                                                                          | NM_012335    |
| A_23_P217428   | -5.183864  | down | 2.31E-02 | 1.221E-03 | 4.1952915 | 1.8212636 | 1.7804794 | ARHGAP6               | Homo sapiens Rho GTPase activating protein 6 (ARHGAP6), transcript variant 1, mRNA [NM_013427]                                                            | NM_013427    |
| A_23_P8108     | -8.737076  | down | 2.33E-02 | 1.327E-03 | 9.132545  | 6.005395  | 5.023675  | HLA-DQB1              | Homo sapiens major histocompatibility complex, class II, DQ beta 1 (HLA-DQB1), transcript variant 3, mRNA [NM_001243962]                                  | NM_001243962 |
| A_22_P00001149 | -2.2823474 | down | 2.33E-02 | 1.323E-03 | 6.5212007 | 5.3306823 | 5.3748198 | PCED1B-AS1            | PCED1B antisense RNA 1 [Source:HGNC Symbol;Acc:HGNC:44166] [ENST00000547851]                                                                              | AK092995     |
| A_32_P351968   | -15.454317 | down | 3.15E-02 | 2.249E-03 | 9.470667  | 5.5207458 | 3.0833707 | HLA-DMB               | Homo sapiens major histocompatibility complex, class II, DM beta (HLA-DMB), mRNA [NM_002118]                                                              | NM_002118    |
| A_21_P0000024  | -35.067112 | down | 1.28E-02 | 4.344E-04 | 8.164593  | 3.032546  | 2.332002  | FLT1                  | Homo sapiens fms-related tyrosine kinase 4 (FLT1), transcript variant 4, mRNA [NM_001160031]                                                              | NM_001160031 |
| A_23_P45099    | -25.553152 | down | 1.79E-03 | 1.829E-05 | 10.294619 | 5.6191893 | 1.7380695 | HLA-DRB5              | Homo sapiens major histocompatibility complex, class II, DR beta 5 (HLA-DRB5), mRNA [NM_002125]                                                           | NM_002125    |
| A_23_P34644    | -8.816733  | down | 2.32E-02 | 1.291E-03 | 5.6735415 | 2.5332973 | 1.9789033 | FCGR2B                | Homo sapiens Fc fragment of IgG, low affinity IIb, receptor (CD32) (FCGR2B), transcript variant 1, mRNA [NM_004001]                                       | NM_004001    |
| A_33_P3395314  | -22.352425 | down | 3.65E-03 | 5.685E-05 | 6.5783424 | 2.095983  | 3.2254772 |                       |                                                                                                                                                           |              |
| A_33_P3281695  | -3.922371  | down | 1.18E-02 | 3.610E-04 | 4.297182  | 2.3254561 | 1.8864207 | NLRP3                 | Homo sapiens NLR family, pyrin domain containing 3 (NLRP3), transcript variant 6, mRNA [NM_001243133]                                                     | NM_001243133 |
| A_22_P00003850 | -6.968093  | down | 2.62E-02 | 1.651E-03 | 6.1644697 | 3.3637059 | 2.0599988 | LINC01272             | Homo sapiens long intergenic non-protein coding RNA 1272 (LINC01272), mRNA [NM_001278655]                                                                 | NM_001278655 |
| A_23_P42746    | -8.417564  | down | 3.61E-02 | 2.883E-03 | 5.23482   | 2.161417  | 2.412321  | NCF1                  | Homo sapiens neutrophil cytosolic factor 1 (NCF1), mRNA [NM_000265]                                                                                       | NM_000265    |
| A_33_P3354604  | -6.731958  | down | 2.33E-02 | 1.308E-03 | 5.254097  | 2.5030708 | 2.548044  | CCL4L2                | Homo sapiens chemokine (C-C motif) ligand 4-like 2 (CCL4L2), transcript variant CCL4L2b2, mRNA [NM_001291470]                                             | NM_001291470 |
| A_23_P253350   | -9.247047  | down | 2.35E-02 | 1.353E-03 | 5.300724  | 2.0917313 | 2.44296   | C8orf4                | Homo sapiens chromosome 8 open reading frame 4 (C8orf4), mRNA [NM_020130]                                                                                 | NM_020130    |
| A_23_P114903   | -9.110917  | down | 5.62E-03 | 1.147E-04 | 7.7671804 | 4.579584  | 5.0904765 | HSPA6                 | Homo sapiens heat shock 70kDa protein 6 (HSP70B) (HSPA6), mRNA [NM_002155]                                                                                | NM_002155    |
| A_23_P39386    | -5.7741847 | down | 9.28E-03 | 2.461E-04 | 10.07419  | 7.544573  | 7.324834  | HCST                  | Homo sapiens hematopoietic cell signal transducer (HCST), transcript variant 1, mRNA [NM_014266]                                                          | NM_014266    |
| A_23_P214627   | -57.58914  | down | 2.27E-02 | 1.182E-03 | 11.226027 | 5.3783016 | 1.7963964 | AIF1                  | Homo sapiens allograft inflammatory factor 1 (AIF1), transcript variant 2, mRNA [NM_004847]                                                               | NM_004847    |
| A_21_P0005146  | -3.071683  | down | 4.41E-02 | 3.903E-03 | 3.6513722 | 2.032343  | 2.23365   | lnc-FAM120B-6         | LNCipedia lincRNA (lnc-FAM120B-6), lincRNA [lnc-FAM120B-6:1]                                                                                              |              |
| A_24_P381505   | -2.1656611 | down | 1.82E-02 | 8.290E-04 | 4.7387333 | 3.623923  | 2.8821268 | GLIPR1L2              | Homo sapiens GLI pathogenesis-related 1 like 2 (GLIPR1L2), transcript variant 2, mRNA [NM_152436]                                                         | NM_152436    |
| A_33_P3260614  | -4.5588655 | down | 4.92E-02 | 4.928E-03 | 8.758802  | 6.5701275 | 8.711955  | PLCB2                 | Homo sapiens phospholipase C, beta 2 (PLCB2), transcript variant 1, mRNA [NM_004573]                                                                      | NM_004573    |
| A_23_P145096   | -26.954206 | down | 2.47E-02 | 1.487E-03 | 6.7878947 | 2.0354564 | 1.7366457 | PLA2G7                | Homo sapiens phospholipase A2, group VII (platelet-activating factor acetylhydrolase, plasma) (PLA2G7), transcript variant 1, mRNA [NM_005084]            | NM_005084    |
| A_22_P00021967 | -6.235055  | down | 2.74E-02 | 1.749E-03 | 5.112222  | 2.4718199 | 3.0393438 |                       |                                                                                                                                                           |              |
| A_22_P00002572 | -4.3804617 | down | 2.56E-02 | 1.580E-03 | 4.127658  | 1.9965748 | 1.9118009 | LOC100506388          | Homo sapiens uncharacterized LOC100506388 (LOC100506388), transcript variant 1, mRNA [NM_001242780]                                                       | NM_001242780 |
| A_33_P3260654  | -38.56518  | down | 2.32E-02 | 1.285E-03 | 7.473015  | 2.2037876 | 2.8726213 |                       | T cell receptor beta constant 1 [Source:HGNC Symbol;Acc:HGNC:12156] [ENST00000610439]                                                                     | EU030678     |
| A_23_P357284   | -17.115877 | down | 3.80E-02 | 3.078E-03 | 8.002087  | 3.904823  | 2.5731583 | GPR4                  | Homo sapiens G protein-coupled receptor 4 (GPR4), mRNA [NM_005282]                                                                                        | NM_005282    |
| A_33_P3262635  | -31.43896  | down | 1.74E-03 | 1.665E-05 | 7.3907447 | 2.416263  | 2.6226783 | CECR1                 | Homo sapiens cat eye syndrome chromosome region, candidate 1 (CECR1), transcript variant 3, mRNA [NM_001282225]                                           | NM_001282225 |
| A_33_P3224710  | -9.460724  | down | 1.97E-03 | 2.192E-05 | 4.96912   | 1.7271695 | 1.7166363 | TFEC                  | Homo sapiens transcription factor EC (TFEC), transcript variant 1, mRNA [NM_012252]                                                                       | NM_012252    |
| A_33_P3267799  | -10.352207 | down | 3.31E-02 | 2.471E-03 | 5.894442  | 2.5225756 | 1.7456462 | LILRB4                | Homo sapiens leukocyte immunoglobulin-like receptor, subfamily B (with TM and ITIM domains), member 4 (LILRB4), transcript variant 1, mRNA [NM_001278426] | NM_001278426 |
| A_23_P49816    | -10.598544 | down | 1.00E-02 | 2.839E-04 | 10.325027 | 6.9192333 | 3.197973  | ADAP2                 | Homo sapiens ArfGAP with dual PH domains 2 (ADAP2), mRNA [NM_018404]                                                                                      | NM_018404    |
| A_22_P00013663 | -3.4355783 | down | 2.02E-02 | 9.892E-04 | 3.5067773 | 1.7262243 | 1.8835738 | lnc-RP11-680F20.4.1-2 | LNCipedia lincRNA (lnc-RP11-680F20.4.1-2), lincRNA [lnc-RP11-680F20.4.1-2:2]                                                                              |              |
| A_23_P4773     | -42.05727  | down | 4.19E-03 | 7.476E-05 | 7.338848  | 1.944565  | 1.8311121 | LILRB5                | Homo sapiens leukocyte immunoglobulin-like receptor, subfamily B (with TM and ITIM domains), member 5 (LILRB5), transcript variant 2, mRNA [NM_006840]    | NM_006840    |
| A_33_P3370575  | -11.434851 | down | 1.14E-03 | 4.456E-06 | 5.2325134 | 1.717148  | 1.7106786 | CD200                 | Homo sapiens CD200 molecule (CD200), transcript variant 2, mRNA [NM_001004196]                                                                            | NM_001004196 |
| A_23_P130113   | -5.0134974 | down | 9.70E-03 | 2.647E-04 | 4.559923  | 2.2341058 | 3.1676865 | ASGR2                 | Homo sapiens asialoglycoprotein receptor 2 (ASGR2), transcript variant H2, mRNA [NM_080912]                                                               | NM_080912    |
| A_23_P207564   | -23.648846 | down | 9.21E-03 | 2.418E-04 | 8.672113  | 4.1084156 | 2.6719205 | CCL4L2                | Homo sapiens chemokine (C-C motif) ligand 4-like 2 (CCL4L2), transcript variant CCL4L2b2, mRNA [NM_001291470]                                             | NM_001291470 |
| A_33_P3421351  | -11.692541 | down | 3.63E-02 | 2.909E-03 | 5.858863  | 2.3113463 | 5.1388836 | TRAF3IP3              | Homo sapiens TRAF3 interacting protein 3 (TRAF3IP3), transcript variant 2, mRNA [NM_001287754]                                                            | NM_001287754 |
| A_22_P00014094 | -51.379932 | down | 4.39E-04 | 7.057E-07 | 7.928477  | 2.2453434 | 1.8895507 | SASH3                 | Homo sapiens SAM and SH3 domain containing 3 (SASH3), mRNA [NM_018990]                                                                                    | NM_018990    |
| A_24_P232365   | -10.003642 | down | 3.41E-02 | 2.633E-03 | 6.0244684 | 2.702015  | 2.218468  | APBB1IP               | Homo sapiens amyloid beta (A4) precursor protein-binding, family B, member 1 interacting protein (APBB1IP), mRNA [NM_019043]                              | NM_019043    |
| A_24_P82749    | -6.1848125 | down | 4.16E-02 | 3.558E-03 | 5.7402515 | 3.1115217 | 2.970683  | CD37                  | Homo sapiens CD37 molecule (CD37), transcript variant 1, mRNA [NM_0011774]                                                                                | NM_0011774   |
| A_33_P3362611  | -17.983524 | down | 3.38E-02 | 2.587E-03 | 7.0659137 | 2.89731   | 1.8910775 | ELTD1                 | Homo sapiens EGF, latrophilin and seven transmembrane domain containing 1 (ELTD1), mRNA [NM_022159]                                                       | NM_022159    |
| A_23_P314250   | -4.002621  | down | 3.50E-03 | 5.092E-05 | 7.5346913 | 5.5337462 | 6.117605  | FAM78A                | Homo sapiens family with sequence similarity 78, member A (FAM78A), mRNA [NM_033387]                                                                      | NM_033387    |
| A_23_P13493    | -6.813105  | down | 3.79E-02 | 3.063E-03 | 4.4986906 | 1.7303782 | 1.7190976 | OR51E1                | Homo sapiens olfactory receptor, family 51, subfamily E, member 1 (OR51E1), mRNA [NM_152430]                                                              | NM_152430    |
| A_23_P12554    | -3.4135804 | down | 4.47E-02 | 4.069E-03 | 3.5554242 | 1.7841384 | 1.7701377 | PKD2L1                | Homo sapiens polycystic kidney disease 2-like 1 (PKD2L1), transcript variant 1, mRNA [NM_016112]                                                          | NM_016112    |
| A_24_P159434   | -5.6398897 | down | 4.63E-03 | 8.495E-05 | 4.294293  | 1.7986261 | 1.7847524 | CD300A                | Homo sapiens CD300a molecule (CD300A), transcript variant 1, mRNA [NM_007261]                                                                             | NM_007261    |



|                |            |      |          |           |           |           |           |              |                                                                                                                                                        |              |
|----------------|------------|------|----------|-----------|-----------|-----------|-----------|--------------|--------------------------------------------------------------------------------------------------------------------------------------------------------|--------------|
| A_22_P00007720 | -20.176544 | down | 1.74E-03 | 1.726E-05 | 10.115517 | 5.7809095 | 1.8261281 | HLA-DQB1     | Homo sapiens major histocompatibility complex, class II, DQ beta 1 (HLA-DQB1), transcript variant 2, mRNA [NM_001243961]                               | NM_001243961 |
| A_23_P218770   | -4.809393  | down | 3.15E-02 | 2.257E-03 | 9.273399  | 7.0075445 | 6.243514  | RAC2         | Homo sapiens ras-related C3 botulinum toxin substrate 2 (rho family, small GTP binding protein Rac2) (RAC2), mRNA [NM_002872]                          | NM_002872    |
| A_23_P74547    | -31.531076 | down | 2.22E-03 | 2.550E-05 | 7.301684  | 2.3229814 | 1.937281  | CD53         | Homo sapiens CD53 molecule (CD53), transcript variant 1, mRNA [NM_001040033]                                                                           | NM_001040033 |
| A_23_P74778    | -3.8021564 | down | 3.28E-02 | 2.442E-03 | 12.22337  | 10.296552 | 11.198404 | C1orf54      | Homo sapiens chromosome 1 open reading frame 54 (C1orf54), transcript variant 3, mRNA [NM_024579]                                                      | NM_024579    |
| A_23_P171074   | -18.39085  | down | 1.69E-02 | 7.409E-04 | 7.446327  | 3.2454112 | 6.379173  | ITM2A        | Homo sapiens integral membrane protein 2A (ITM2A), transcript variant 1, mRNA [NM_004867]                                                              | NM_004867    |
| A_23_P169257   | -3.5178084 | down | 3.38E-02 | 2.579E-03 | 3.5488849 | 1.734208  | 1.7227188 | TNFSF8       | Homo sapiens tumor necrosis factor (ligand) superfamily, member 8 (TNFSF8), transcript variant 1, mRNA [NM_0012444]                                    | NM_0012444   |
| A_24_P165423   | -13.778615 | down | 4.00E-02 | 3.359E-03 | 7.977746  | 4.193387  | 3.2356305 | RBP7         | Homo sapiens retinol binding protein 7, cellular (RBP7), mRNA [NM_052960]                                                                              | NM_052960    |
| A_23_P407565   | -14.775864 | down | 1.00E-02 | 2.841E-04 | 6.020051  | 2.1387913 | 2.4984813 | CX3CR1       | Homo sapiens chemokine (C-X3-C motif) receptor 1 (CX3CR1), transcript variant 4, mRNA [NM_001337]                                                      | NM_001337    |
| A_33_P3309526  | -17.943033 | down | 9.69E-03 | 2.593E-04 | 6.2156324 | 2.0502806 | 2.350549  | PTPRC        | Homo sapiens protein tyrosine phosphatase, receptor type, C (PTPRC), transcript variant 1, mRNA [NM_002838]                                            | NM_002838    |
| A_22_P00004088 | -11.106792 | down | 2.90E-02 | 1.924E-03 | 6.4615235 | 2.9881532 | 2.772223  |              |                                                                                                                                                        | AF086288     |
| A_23_P28434    | -10.960993 | down | 6.81E-03 | 1.544E-04 | 10.988644 | 7.534337  | 6.4377174 | VAMP8        | Homo sapiens vesicle-associated membrane protein 8 (VAMP8), mRNA [NM_003761]                                                                           | NM_003761    |
| A_23_P160849   | -3.9476922 | down | 4.12E-02 | 3.496E-03 | 9.022164  | 7.041155  | 7.232574  | FCER1G       | Homo sapiens Fc fragment of IgE, high affinity I, receptor for; gamma polypeptide (FCER1G), mRNA [NM_004106]                                           | NM_004106    |
| A_23_P153524   | -2.2030053 | down | 3.90E-02 | 3.196E-03 | 5.8121614 | 4.6726885 | 6.123244  | C19orf73     | Homo sapiens chromosome 19 open reading frame 73 (C19orf73), mRNA [NM_018111]                                                                          | NM_018111    |
| A_24_P148717   | -42.197342 | down | 4.50E-04 | 1.146E-06 | 7.2481885 | 1.8491081 | 2.3373945 | CCR1         | Homo sapiens chemokine (C-C motif) receptor 1 (CCR1), mRNA [NM_001295]                                                                                 | NM_001295    |
| A_23_P162386   | -5.8293486 | down | 1.21E-02 | 3.888E-04 | 4.6184764 | 2.0751417 | 1.7620293 | BIN2         | Homo sapiens bridging integrator 2 (BIN2), transcript variant 1, mRNA [NM_016293]                                                                      | NM_016293    |
| A_23_P141429   | -6.533615  | down | 4.99E-02 | 5.047E-03 | 7.3827133 | 4.674832  | 4.7960253 | ABI3         | Homo sapiens ABI family, member 3 (ABI3), transcript variant 1, mRNA [NM_016428]                                                                       | NM_016428    |
| A_19_P00320718 | -29.676474 | down | 1.80E-02 | 8.178E-04 | 7.89283   | 3.001582  | 2.4306285 | PCAT19       | Homo sapiens prostate cancer associated transcript 19 (non-protein coding) (PCAT19), long non-coding RNA [NR_040109]                                   | NR_040109    |
| A_33_P3405213  | -36.59028  | down | 4.53E-02 | 4.194E-03 | 8.499485  | 3.3060966 | 2.5801327 | PECAM1       | Homo sapiens platelet/endothelial cell adhesion molecule 1 (PECAM1), mRNA [NM_000442]                                                                  | NM_000442    |
| A_24_P192914   | -97.29555  | down | 1.23E-03 | 5.340E-06 | 9.041411  | 2.4371095 | 2.4438047 | AMICA1       | Homo sapiens adhesion molecule, interacts with CXADR antigen 1 (AMICA1), transcript variant 2, mRNA [NM_153206]                                        | NM_153206    |
| A_33_P3222233  | -2.6113489 | down | 1.36E-02 | 4.934E-04 | 3.0992913 | 1.7144961 | 2.523618  | CC2D2B       | Homo sapiens coiled-coil and C2 domain containing 2B (CC2D2B), transcript variant 1, mRNA [NM_001159747]                                               | NM_001159747 |
| A_23_P401700   | -27.467697 | down | 4.47E-02 | 4.072E-03 | 7.7231545 | 2.9434905 | 1.895978  | APBB1IP      | Homo sapiens amyloid beta (A4) precursor protein-binding, family B, member 1 interacting protein (APBB1IP), mRNA [NM_019043]                           | NM_019043    |
| A_23_P23279    | -15.803401 | down | 1.87E-03 | 2.003E-05 | 5.6964517 | 1.7142885 | 1.714768  | RCSD1        | Homo sapiens RCSD domain containing 1 (RCSD1), mRNA [NM_052862]                                                                                        | NM_052862    |
| A_23_P27795    | -12.19999  | down | 1.28E-02 | 4.427E-04 | 8.092021  | 4.483213  | 3.7235768 | SPINT2       | Homo sapiens serine peptidase inhibitor, Kunitz type, 2 (SPINT2), transcript variant a, mRNA [NM_021102]                                               | NM_021102    |
| A_33_P3259203  | -45.398624 | down | 1.46E-02 | 5.604E-04 | 8.761564  | 3.2569876 | 5.2463694 | TMEM255B     | transmembrane protein 255B [Source:HGNC Symbol;Acc:HGNC:28297] [ENST00000375353]                                                                       | XM_006719983 |
| A_24_P393740   | -13.053086 | down | 1.18E-02 | 3.596E-04 | 5.563361  | 1.8570241 | 1.8972706 | FYB          | Homo sapiens FYN binding protein (FYB), transcript variant 1, mRNA [NM_001465]                                                                         | NM_001465    |
| A_24_P54390    | -          | down | 2.34E-02 | 1.345E-03 | 6.1724224 | 2.2078085 | 1.8956738 | RASGRP3      | Homo sapiens RAS guanyl releasing protein 3 (calcium and DAG-regulated) (RASGRP3), transcript variant 2, mRNA [NM_170672]                              | NM_170672    |
| A_23_P63390    | -36.571632 | down | 2.89E-02 | 1.895E-03 | 8.26232   | 3.0696664 | 2.5077763 | FCGR1B       | Homo sapiens Fc fragment of IgG, high affinity I, receptor (CD64) (FCGR1B), transcript variant 1, mRNA [NM_001017986]                                  | NM_001017986 |
| A_23_P70688    | -4.268147  | down | 2.15E-02 | 1.065E-03 | 8.744747  | 6.6511374 | 6.290273  | LY86         | Homo sapiens lymphocyte antigen 86 (LY86), mRNA [NM_004271]                                                                                            | NM_004271    |
| A_19_P00808044 | -55.488594 | down | 7.85E-03 | 1.980E-04 | 7.747858  | 1.9537386 | 1.8191707 | PCAT19       | Homo sapiens prostate cancer associated transcript 19 (non-protein coding) (PCAT19), long non-coding RNA [NR_040109]                                   | NR_040109    |
| A_23_P217901   | -7.816332  | down | 2.47E-03 | 3.276E-05 | 5.031646  | 2.065154  | 1.9370294 | TSTD1        | Homo sapiens thiosulfate sulfurtransferase (rhodanese)-like domain containing 1 (TSTD1), transcript variant 1, mRNA [NM_001113207]                     | NM_001113207 |
| A_33_P3281273  | -14.574219 | down | 2.19E-02 | 1.116E-03 | 7.1828065 | 3.3174598 | 2.2425718 | S1PR4        | Homo sapiens sphingosine-1-phosphate receptor 4 (S1PR4), mRNA [NM_003775]                                                                              | NM_003775    |
| A_21_P0014497  | -8.487237  | down | 4.78E-02 | 4.609E-03 | 4.8362713 | 1.7509763 | 1.7410145 | LOC101928612 | PREDICTED: Homo sapiens uncharacterized LOC101928612 (LOC101928612), transcript variant X1, ncRNA [XR_245345]                                          | XR_245345    |
| A_23_P98565    | -11.989586 | down | 9.75E-03 | 2.686E-04 | 5.340844  | 1.7571342 | 2.8694618 | MS4A14       | Homo sapiens membrane-spanning 4-domains, subfamily A, member 14 (MS4A14), transcript variant 1, mRNA [NM_032597]                                      | NM_032597    |
| A_23_P103104   | -18.28997  | down | 7.85E-03 | 1.981E-04 | 6.364608  | 2.1716273 | 1.719123  | MFNG         | Homo sapiens MFNG O-fucosylpeptide 3-beta-N-acetylglucosaminyltransferase (MFNG), transcript variant 1, mRNA [NM_002405]                               | NM_002405    |
| A_23_P208493   | -31.601334 | down | 1.28E-03 | 6.403E-06 | 6.886791  | 1.9048779 | 1.8533506 | LILRB2       | Homo sapiens leukocyte immunoglobulin-like receptor, subfamily B (with TM and ITIM domains), member 2 (LILRB2), transcript variant 1, mRNA [NM_005874] | NM_005874    |
| A_23_P201778   | -4.91427   | down | 3.80E-02 | 3.090E-03 | 4.1063223 | 1.8093451 | 2.2883413 | PTPN7        | Homo sapiens protein tyrosine phosphatase, non-receptor type 7 (PTPN7), transcript variant 2, mRNA [NM_080588]                                         | NM_080588    |
| A_23_P147711   | -13.277663 | down | 1.28E-02 | 4.448E-04 | 5.8459935 | 2.1150641 | 2.8628836 | NPR1         | Homo sapiens natriuretic peptide receptor 1 (NPR1), mRNA [NM_000906]                                                                                   | NM_000906    |
| A_24_P71973    | -33.459232 | down | 1.74E-03 | 1.452E-05 | 7.1970153 | 2.1326828 | 1.9697335 | KDR          | Homo sapiens kinase insert domain receptor (a type III receptor tyrosine kinase) (KDR), mRNA [NM_002253]                                               | NM_002253    |
| A_23_P142075   | -22.159286 | down | 6.24E-03 | 1.368E-04 | 10.747187 | 6.277347  | 5.038362  | ACP5         | Homo sapiens acid phosphatase 5, tartrate resistant (ACP5), transcript variant 4, mRNA [NM_001611]                                                     | NM_001611    |
| A_23_P25155    | -4.482456  | down | 1.75E-02 | 7.753E-04 | 4.643339  | 2.4790497 | 3.2453063 | GPR84        | Homo sapiens G protein-coupled receptor 84 (GPR84), mRNA [NM_020370]                                                                                   | NM_020370    |
| A_24_P353638   | -9.509677  | down | 2.46E-02 | 1.470E-03 | 5.5454903 | 2.296094  | 2.7051888 | SLAMF7       | Homo sapiens SLAM family member 7 (SLAMF7), transcript variant 1, mRNA [NM_021181]                                                                     | NM_021181    |
| A_24_P222655   | -42.60068  | down | 2.43E-02 | 1.442E-03 | 9.269215  | 3.85641   | 1.7250166 | C1QA         | Homo sapiens complement component 1, q subcomponent, A chain (C1QA), mRNA [NM_015991]                                                                  | NM_015991    |
| A_23_P78608    | -8.991813  | down | 5.96E-03 | 1.261E-04 | 5.556978  | 2.3883662 | 3.6445556 | DENND1C      | Homo sapiens DENN/MADD domain containing 1C (DENND1C), transcript variant 1, mRNA [NM_024898]                                                          | NM_024898    |
| A_23_P155057   | -31.202654 | down | 2.51E-02 | 1.523E-03 | 8.455984  | 3.4923873 | 1.7995181 | CYTH4        | Homo sapiens cytohesin 4 (CYTH4), mRNA [NM_013385]                                                                                                     | NM_013385    |
| A_23_P30913    | -25.578663 | down | 1.38E-02 | 5.094E-04 | 11.487638 | 6.8107696 | 1.9852788 | HLA-DPA1     | Homo sapiens major histocompatibility complex, class II, DP alpha 1 (HLA-DPA1), transcript variant 1, mRNA [NM_033554]                                 | NM_033554    |
| A_33_P3293918  | -11.797264 | down | 7.35E-03 | 1.724E-04 | 9.153873  | 5.593493  | 4.4692984 | SH2D3C       | Homo sapiens SH2 domain containing 3C (SH2D3C), transcript variant 1, mRNA [NM_170600]                                                                 | NM_170600    |
| A_23_P64661    | -33.935055 | down | 2.39E-03 | 2.920E-05 | 7.56378   | 2.4790757 | 1.9108412 | ARHGAP9      | Homo sapiens Rho GTPase activating protein 9 (ARHGAP9), transcript variant 1, mRNA [NM_032496]                                                         | NM_032496    |
| A_32_P56001    | -31.595047 | down | 1.97E-02 | 9.362E-04 | 7.4194555 | 2.437829  | 2.396825  | CD93         | Homo sapiens CD93 molecule (CD93), mRNA [NM_012072]                                                                                                    | NM_012072    |
| A_23_P143621   | -2.793077  | down | 4.47E-02 | 4.041E-03 | 3.242589  | 1.7607336 | 3.6628227 | CRYBB1       | Homo sapiens crystallin, beta B1 (CRYBB1), mRNA [NM_001887]                                                                                            | NM_001887    |
| A_24_P64167    | -3.7395594 | down | 2.90E-02 | 1.921E-03 | 4.360846  | 2.4579778 | 2.0863369 | PTGS1        | Homo sapiens prostaglandin-endoperoxide synthase 1 (prostaglandin G/H synthase and cyclooxygenase) (PTGS1), transcript variant 1, mRNA [NM_000962]     | NM_000962    |

|               |             |      |          |           |           |           |           |          |                                                                                                                                                        |              |
|---------------|-------------|------|----------|-----------|-----------|-----------|-----------|----------|--------------------------------------------------------------------------------------------------------------------------------------------------------|--------------|
| A_33_P3332970 | -4.6972375  | down | 3.20E-02 | 2.353E-03 | 5.9509516 | 3.719139  | 3.738103  | CLEC2B   | Homo sapiens C-type lectin domain family 2, member B (CLEC2B), mRNA [NM_005127]                                                                        | NM_005127    |
| A_24_P295010  | -10.462926  | down | 4.11E-04 | 3.145E-07 | 5.1060286 | 1.7188141 | 1.7238295 | SERPINB9 | Homo sapiens serpin peptidase inhibitor, clade B (ovalbumin), member 9 (SERPINB9), mRNA [NM_004155]                                                    | NM_004155    |
| A_24_P132383  | -13.827485  | down | 4.13E-03 | 7.268E-05 | 5.9173336 | 2.1278667 | 1.8754807 | GIMAP8   | Homo sapiens GTPase, IMAP family member 8 (GIMAP8), mRNA [NM_175571]                                                                                   | NM_175571    |
| A_33_P3363637 | -10.612658  | down | 1.57E-03 | 1.002E-05 | 5.147038  | 1.7393239 | 2.4961314 | BLNK     | Homo sapiens B-cell linker (BLNK), transcript variant 1, mRNA [NM_013314]                                                                              | NM_013314    |
| A_23_P119353  | -17.052927  | down | 3.20E-02 | 2.365E-03 | 10.288305 | 6.1963577 | 7.4467077 | RASIP1   | Homo sapiens Ras interacting protein 1 (RASIP1), mRNA [NM_017805]                                                                                      | NM_017805    |
| A_23_P104464  | -34.527203  | down | 1.46E-02 | 5.524E-04 | 7.1164274 | 2.0067658 | 1.8905094 | ALOX5    | Homo sapiens arachidonate 5-lipoxygenase (ALOX5), transcript variant 1, mRNA [NM_000698]                                                               | NM_000698    |
| A_23_P19510   | -7.546725   | down | 2.31E-02 | 1.232E-03 | 6.921971  | 4.00612   | 3.8763793 | HLA-DQB2 | Homo sapiens major histocompatibility complex, class II, DQ beta 2 (HLA-DQB2), transcript variant 2, mRNA [NM_001198858]                               | NM_001198858 |
| A_23_P152428  | -5.028871   | down | 5.09E-03 | 9.986E-05 | 4.298614  | 1.9683794 | 2.481165  | MARVELD3 | Homo sapiens MARVEL domain containing 3 (MARVELD3), transcript variant 2, mRNA [NM_052858]                                                             | NM_052858    |
| A_23_P42588   | -15.888238  | down | 1.57E-03 | 9.279E-06 | 5.8523107 | 1.8624233 | 1.8191569 | GIMAP5   | Homo sapiens GTPase, IMAP family member 5 (GIMAP5), mRNA [NM_018384]                                                                                   | NM_018384    |
| A_24_P274831  | -96.41034   | down | 6.81E-05 | 1.737E-08 | 8.336134  | 1.745018  | 1.9654166 | GIMAP7   | Homo sapiens GTPase, IMAP family member 7 (GIMAP7), mRNA [NM_153236]                                                                                   | NM_153236    |
| A_24_P376391  | -2.28487    | down | 1.66E-02 | 7.200E-04 | 11.211205 | 10.019093 | 10.160099 | PLXND1   | Homo sapiens plexin D1 (PLXND1), mRNA [NM_015103]                                                                                                      | NM_015103    |
| A_23_P68121   | -3.2902646  | down | 3.15E-02 | 2.261E-03 | 3.5402412 | 1.8220376 | 3.381834  | PSD4     | Homo sapiens pleckstrin and Sec7 domain containing 4 (PSD4), mRNA [NM_012455]                                                                          | NM_012455    |
| A_32_P87697   | -30.917019  | down | 4.50E-02 | 4.131E-03 | 9.463553  | 4.513224  | 1.7267615 | HLA-DRA  | Homo sapiens major histocompatibility complex, class II, DR alpha (HLA-DRA), mRNA [NM_019111]                                                          | NM_019111    |
| A_23_P218369  | -21.500725  | down | 3.09E-02 | 2.145E-03 | 7.516018  | 3.0897043 | 3.4217427 | CCL14    | Homo sapiens chemokine (C-C motif) ligand 14 (CCL14), transcript variant 3, mRNA [NM_032963]                                                           | NM_032963    |
| A_23_P79069   | -6.513126   | down | 2.32E-02 | 1.285E-03 | 9.629028  | 6.9256783 | 6.243986  | RASAL3   | Homo sapiens RAS protein activator like 3 (RASAL3), mRNA [NM_022904]                                                                                   | NM_022904    |
| A_23_P83098   | -8.115382   | down | 2.62E-02 | 1.652E-03 | 5.5987844 | 2.5781255 | 2.0708776 | ALDH1A1  | Homo sapiens aldehyde dehydrogenase 1 family, member A1 (ALDH1A1), mRNA [NM_000689]                                                                    | NM_000689    |
| A_33_P3364821 | -34.592438  | down | 1.65E-02 | 7.081E-04 | 8.618453  | 3.5060685 | 2.6705446 | PTPRC    | Homo sapiens protein tyrosine phosphatase, receptor type, C (PTPRC), transcript variant 1, mRNA [NM_002838]                                            | NM_002838    |
| A_23_P75769   | -35.01143   | down | 1.21E-02 | 3.835E-04 | 8.288646  | 3.1588917 | 3.3740919 | MS4A4A   | Homo sapiens membrane-spanning 4-domains, subfamily A, member 4A (MS4A4A), transcript variant 2, mRNA [NM_024021]                                      | NM_024021    |
| A_23_P382065  | -51.88793   | down | 3.59E-03 | 5.345E-05 | 7.500296  | 1.802969  | 2.516707  | EMCN     | Homo sapiens endomucin (EMCN), transcript variant 1, mRNA [NM_016242]                                                                                  | NM_016242    |
| A_23_P212655  | -7.3689327  | down | 2.90E-02 | 1.958E-03 | 5.146054  | 2.2645981 | 1.9197505 | KLHL6    | Homo sapiens kelch-like family member 6 (KLHL6), mRNA [NM_130446]                                                                                      | NM_130446    |
| A_23_P12746   | -16.732304  | down | 1.92E-02 | 8.890E-04 | 5.914506  | 1.8499416 | 1.8050408 | MRC1     | Homo sapiens mannose receptor, C type 1 (MRC1), mRNA [NM_002438]                                                                                       | NM_002438    |
| A_23_P117662  | -12.766525  | down | 4.52E-02 | 4.171E-03 | 7.1616917 | 3.4873977 | 4.196031  | HDC      | Homo sapiens histidine decarboxylase (HDC), mRNA [NM_002112]                                                                                           | NM_002112    |
| A_33_P3343120 | -22.77904   | down | 1.74E-03 | 1.493E-05 | 6.321413  | 1.811778  | 2.0350127 | IRF8     | Homo sapiens interferon regulatory factor 8 (IRF8), mRNA [NM_002163]                                                                                   | NM_002163    |
| A_23_P150768  | -27.56982   | down | 2.16E-02 | 1.077E-03 | 7.8200483 | 3.0350301 | 1.7319604 | SLCO2B1  | Homo sapiens solute carrier organic anion transporter family, member 2B1 (SLCO2B1), transcript variant 1, mRNA [NM_007256]                             | NM_007256    |
| A_23_P72697   | -9.351914   | down | 3.63E-02 | 2.914E-03 | 8.360227  | 5.134965  | 4.665314  | GPIHBP1  | Homo sapiens glycosylphosphatidylinositol anchored high density lipoprotein binding protein 1 (GPIHBP1), transcript variant 1, mRNA [NM_178172]        | NM_178172    |
| A_23_P430411  | -2.2640977  | down | 4.92E-02 | 4.936E-03 | 3.5698285 | 2.3908923 | 4.004017  | ITGB2    | integrin, beta 2 (complement component 3 receptor 3 and 4 subunit) [Source:HGNC Symbol;Acc:HGNC:6155]<br>[ENST00000610622]                             | L78790       |
| A_33_P3842556 | -27.61616   | down | 5.09E-03 | 9.734E-05 | 7.668912  | 2.8814712 | 3.1743855 | IKZF1    | Homo sapiens IKAROS family zinc finger 1 (Ikaros) (IKZF1), transcript variant 1, mRNA [NM_006060]                                                      | NM_006060    |
| A_23_P312132  | -40.147484  | down | 1.12E-03 | 4.013E-06 | 7.370801  | 2.0435634 | 1.7783923 | ITGAX    | Homo sapiens integrin, alpha X (complement component 3 receptor 4 subunit) (ITGAX), transcript variant 2, mRNA [NM_000887]                             | NM_000887    |
| A_32_P217750  | -           | down | 1.65E-02 | 7.121E-04 | 8.067239  | 4.258102  | 3.9113636 | IL3RA    | Homo sapiens interleukin 3 receptor, alpha (low affinity) (IL3RA), transcript variant 1, mRNA [NM_002183]                                              | NM_002183    |
| A_23_P119478  | -14.0173025 | down | 4.47E-02 | 4.094E-03 | 4.439541  | 1.7808656 | 1.7812424 | EBI3     | Homo sapiens Epstein-Barr virus induced 3 (EBI3), mRNA [NM_005755]                                                                                     | NM_005755    |
| A_23_P15414   | -6.3145294  | down | 4.16E-02 | 3.550E-03 | 7.456785  | 5.371042  | 4.8293695 | SCARF1   | Homo sapiens scavenger receptor class F, member 1 (SCARF1), transcript variant 1, mRNA [NM_003693]                                                     | NM_003693    |
| A_33_P3358731 | -4.244938   | down | 2.42E-02 | 1.428E-03 | 6.571018  | 4.9398184 | 6.6458206 | PCSK5    | Homo sapiens proprotein convertase subtilisin/kexin type 5 (PCSK5), transcript variant 2, mRNA [NM_006200]                                             | NM_006200    |
| A_33_P3281403 | -3.0977051  | down | 3.41E-02 | 2.625E-03 | 5.518863  | 3.0132127 | 4.7143154 | TRAF3IP3 | Homo sapiens TRAF3 interacting protein 3 (TRAF3IP3), transcript variant 2, mRNA [NM_001287754]                                                         | NM_001287754 |
| A_33_P3314794 | -5.679054   | down | 1.62E-02 | 6.713E-04 | 5.013661  | 2.1676474 | 3.274991  | IQCA1    | Homo sapiens IQ motif containing with AAA domain 1 (IQCA1), transcript variant 1, mRNA [NM_024726]                                                     | NM_024726    |
| A_23_P215060  | -7.1901083  | down | 1.01E-02 | 2.892E-04 | 11.32992  | 6.7008753 | 4.987583  | PODXL    | Homo sapiens podocalyxin-like (PODXL), transcript variant 1, mRNA [NM_001018111]                                                                       | NM_001018111 |
| A_23_P70095   | -24.744646  | down | 5.09E-03 | 9.782E-05 | 7.1672583 | 2.4509978 | 2.1906507 | CD74     | Homo sapiens CD74 molecule, major histocompatibility complex, class II invariant chain (CD74), transcript variant 3, mRNA [NM_001025158]               | NM_001025158 |
| A_23_P9883    | -26.286688  | down | 1.97E-03 | 2.205E-05 | 6.1986713 | 2.3079886 | 2.2638693 | NLRP3    | Homo sapiens NLR family, pyrin domain containing 3 (NLRP3), transcript variant 3, mRNA [NM_001079821]                                                  | NM_001079821 |
| A_23_P134914  | -14.832426  | down | 2.59E-02 | 1.614E-03 | 4.8568254 | 1.8435152 | 1.822475  | LY6H     | Homo sapiens lymphocyte antigen 6 complex, locus H (LY6H), transcript variant 1, mRNA [NM_002347]                                                      | NM_002347    |
| A_33_P3232688 | -8.074149   | down | 1.23E-02 | 4.049E-04 | 5.2648096 | 2.4138765 | 2.5577228 |          | colony stimulating factor 2 receptor, alpha, low-affinity (granulocyte-macrophage) [Source:HGNC Symbol;Acc:HGNC:2435]<br>[ENST00000381524]             |              |
| A_24_P102821  | -7.2146683  | down | 2.69E-03 | 3.766E-05 | 4.6914577 | 1.822077  | 1.8120251 | PTAFR    | Homo sapiens platelet-activating factor receptor (PTAFR), transcript variant 3, mRNA [NM_000952]                                                       | NM_000952    |
| A_33_P3234277 | -7.307514   | down | 2.02E-02 | 9.618E-04 | 9.672954  | 6.146252  | 5.639378  | HLA-DPA1 | Homo sapiens major histocompatibility complex, class II, DP alpha 1 (HLA-DPA1), transcript variant 2, mRNA [NM_001242524]                              | NM_001242524 |
| A_33_P3397599 | -11.525053  | down | 1.28E-03 | 6.631E-06 | 4.509812  | 1.7381704 | 2.956911  | LILRA6   | Homo sapiens leukocyte immunoglobulin-like receptor, subfamily A (with TM domain), member 6 (LILRA6), transcript variant 2, non-coding RNA [NR_104098] | NR_104098    |
| A_23_P501713  | -6.8288445  | down | 4.56E-02 | 4.245E-03 | 5.2162457 | 2.6399784 | 3.853999  | IL1F10   | Homo sapiens interleukin 1 family, member 10 (theta) (IL1F10), transcript variant 1, mRNA [NM_032556]                                                  | NM_032556    |
| A_23_P429977  | -5.9639463  | down | 2.25E-02 | 1.152E-03 | 8.035948  | 3.487625  | 2.3431072 | KCNQ1    | Homo sapiens potassium voltage-gated channel, KQT-like subfamily, member 1 (KCNQ1), transcript variant 1, mRNA [NM_000218]                             | NM_000218    |
| A_33_P3241269 | -2.9620051  | down | 9.70E-03 | 2.632E-04 | 3.7205534 | 2.1539793 | 1.9568843 | CES1     | Homo sapiens carboxylesterase 1 (CES1), transcript variant 1, mRNA [NM_001025195]                                                                      | NM_001025195 |
| A_33_P3293049 | -2.9620051  | down | 4.84E-02 | 4.719E-03 | 8.894259  | 3.6096234 | 1.8756276 | HLA-DQA1 | Homo sapiens major histocompatibility complex, class II, DQ alpha 1 (HLA-DQA1), mRNA [NM_002122]                                                       | NM_002122    |
| A_32_P234184  | -38.979294  | down | 3.15E-02 | 2.263E-03 | 6.204022  | 3.3732452 | 1.766767  | HES5     | Homo sapiens hes family bHLH transcription factor 5 (HES5), mRNA [NM_001010926]                                                                        | NM_001010926 |
| A_24_P788878  | -7.1145706  | down | 2.02E-02 | 9.802E-04 | 6.349378  | 2.7242343 | 3.7801461 | C2CD4B   | Homo sapiens C2 calcium-dependent domain containing 4B (C2CD4B), mRNA [NM_001007595]                                                                   | NM_001007595 |
| A_23_P23829   | -12.338916  | down | 4.35E-02 | 3.796E-03 | 5.393614  | 2.1784296 | 1.9927781 | CD34     | Homo sapiens CD34 molecule (CD34), transcript variant 2, mRNA [NM_001773]                                                                              | NM_001773    |

|                |            |      |          |           |           |           |           |              |                                                                                                                                                        |              |
|----------------|------------|------|----------|-----------|-----------|-----------|-----------|--------------|--------------------------------------------------------------------------------------------------------------------------------------------------------|--------------|
| A_23_P349966   | -3.0819337 | down | 2.47E-02 | 1.487E-03 | 3.3622007 | 1.7383649 | 1.7383547 | TMEM130      | Homo sapiens transmembrane protein 130 (TMEM130), transcript variant 2, mRNA [NM_152913]                                                               | NM_152913    |
| A_32_P210642   | -12.861407 | down | 2.17E-02 | 1.096E-03 | 9.948479  | 6.263502  | 5.4457808 | EGFL7        | Homo sapiens EGF-like-domain, multiple 7 (EGFL7), transcript variant 2, mRNA [NM_201446]                                                               | NM_201446    |
| A_24_P370472   | -19.498404 | down | 3.09E-02 | 2.160E-03 | 8.735304  | 4.45002   | 2.6026716 | HLA-DRB4     | Homo sapiens major histocompatibility complex, class II, DR beta 4 (HLA-DRB4), mRNA [NM_021983]                                                        | NM_021983    |
| A_23_P166087   | -4.8301706 | down | 2.90E-02 | 1.965E-03 | 8.833349  | 6.561275  | 9.185312  | RASSF2       | Homo sapiens Ras association (Ra)GDS/AF-6 domain family member 2 (RASSF2), transcript variant 1, mRNA [NM_014737]                                      | NM_014737    |
| A_32_P85999    | -46.091084 | down | 1.74E-03 | 1.532E-05 | 7.593442  | 2.067026  | 1.7403121 | CDH13        | Homo sapiens cadherin 13 (CDH13), transcript variant 1, mRNA [NM_001257]                                                                               | NM_001257    |
| A_23_P119835   | -9.688362  | down | 1.35E-02 | 4.815E-04 | 5.583983  | 2.3077302 | 1.7394083 | NLR4         | Homo sapiens NLR family, CARD domain containing 4 (NLR4), transcript variant 1, mRNA [NM_021209]                                                       | NM_021209    |
| A_23_P502336   | -12.011689 | down | 6.78E-03 | 1.522E-04 | 5.5023365 | 1.9159694 | 2.3866901 | EMR2         | Homo sapiens egf-like module containing, mucin-like, hormone receptor-like 2 (EMR2), transcript variant 1, mRNA [NM_013447]                            | NM_013447    |
| A_23_P1083     | -8.044343  | down | 3.18E-02 | 2.313E-03 | 8.182267  | 5.1742926 | 2.8681803 | GJA4         | Homo sapiens gap junction protein, alpha 4, 37kDa (GJA4), mRNA [NM_002060]                                                                             | NM_002060    |
| A_23_P41390    | -7.89289   | down | 3.38E-02 | 2.591E-03 | 5.5159616 | 2.535408  | 3.501287  | SH3TC1       | Homo sapiens SH3 domain and tetratricopeptide repeats 1 (SH3TC1), mRNA [NM_018986]                                                                     | NM_018986    |
| A_33_P3354256  | -4.7519493 | down | 4.84E-02 | 4.754E-03 | 4.8484    | 2.5998807 | 2.333428  | MTSS1        | Homo sapiens metastasis suppressor 1 (MTSS1), transcript variant 1, mRNA [NM_001282971]                                                                | NM_001282971 |
| A_22_P00017885 | -3.120378  | down | 3.64E-02 | 2.930E-03 | 3.932935  | 2.2912142 | 2.6520448 |              |                                                                                                                                                        |              |
| A_23_P54770    | -10.531971 | down | 5.29E-03 | 1.065E-04 | 5.549832  | 2.1531284 | 1.9372051 | APOBR        | Homo sapiens apolipoprotein B receptor (APOBR), mRNA [NM_018690]                                                                                       | NM_018690    |
| A_23_P501822   | -4.755525  | down | 4.47E-02 | 4.030E-03 | 8.523161  | 6.273556  | 6.053876  | JUP          | Homo sapiens junction plakoglobin (JUP), transcript variant 1, mRNA [NM_002230]                                                                        | NM_002230    |
| A_23_P66694    | -5.8736367 | down | 2.31E-02 | 1.224E-03 | 6.489062  | 3.9348078 | 4.192379  | EV12B        | Homo sapiens ecotropic viral integration site 2B (EV12B), mRNA [NM_006495]                                                                             | NM_006495    |
| A_24_P228130   | -19.833874 | down | 1.28E-03 | 6.848E-06 | 6.742334  | 2.432439  | 1.938767  | CCL3L3       | Homo sapiens chemokine (C-C motif) ligand 3-like 3 (CCL3L3), mRNA [NM_001001437]                                                                       | NM_001001437 |
| A_23_P48596    | -37.63382  | down | 4.41E-02 | 3.917E-03 | 12.964043 | 7.730085  | 5.537648  | RNASE1       | Homo sapiens ribonuclease, RNase A family, 1 (pancreatic) (RNASE1), transcript variant 3, mRNA [NM_198232]                                             | NM_198232    |
| A_23_P259621   | -9.928419  | down | 1.28E-02 | 4.475E-04 | 9.076138  | 5.7645736 | 5.694812  | LAT2         | Homo sapiens linker for activation of T cells family, member 2 (LAT2), transcript variant 1, mRNA [NM_032464]                                          | NM_032464    |
| A_24_P103469   | -7.5002766 | down | 1.69E-02 | 7.389E-04 | 7.7312236 | 4.82428   | 3.0848627 | LST1         | Homo sapiens leukocyte specific transcript 1 (LST1), transcript variant 1, mRNA [NM_007161]                                                            | NM_007161    |
| A_33_P3209651  | -4.4218097 | down | 2.33E-02 | 1.315E-03 | 3.8889143 | 1.7442775 | 2.0952373 | WDFY4        | Homo sapiens WDFY family member 4 (WDFY4), mRNA [NM_020945]                                                                                            | NM_020945    |
| A_23_P209678   | -6.365542  | down | 4.05E-03 | 7.026E-05 | 5.7863355 | 3.1160522 | 2.499489  | PLEK         | Homo sapiens pleckstrin (PLEK), mRNA [NM_002664]                                                                                                       | NM_002664    |
| A_33_P3231414  | -13.882396 | down | 4.32E-03 | 7.814E-05 | 5.8720875 | 2.0769029 | 1.7683637 | LILRB1       | Homo sapiens leukocyte immunoglobulin-like receptor, subfamily B (with TM and ITIM domains), member 1 (LILRB1), transcript variant 1, mRNA [NM_006669] | NM_006669    |
| A_33_P3328559  | -11.608732 | down | 1.58E-02 | 6.261E-04 | 7.8397007 | 4.302562  | 5.686454  | TBC1D10C     | Homo sapiens TBC1 domain family, member 10C (TBC1D10C), transcript variant 1, mRNA [NM_198517]                                                         | NM_198517    |
| A_33_P3354607  | -39.116108 | down | 2.69E-03 | 3.753E-05 | 7.4850016 | 2.1953106 | 1.9167371 | CCL4L2       | Homo sapiens chemokine (C-C motif) ligand 4-like 2 (CCL4L2), transcript variant CCL4L2b2, mRNA [NM_001291470]                                          | NM_001291470 |
| A_32_P70158    | -14.022238 | down | 2.74E-02 | 1.752E-03 | 8.505291  | 4.6956463 | 5.124997  | LILRB3       | Homo sapiens leukocyte immunoglobulin-like receptor, subfamily B (with TM and ITIM domains), member 3 (LILRB3), transcript variant 2, mRNA [NM_006864] | NM_006864    |
| A_33_P3379268  | -3.9848883 | down | 2.90E-02 | 1.928E-03 | 4.6254716 | 2.6309323 | 3.4561534 | SCIMP        | Homo sapiens SLP adaptor and CSK interacting membrane protein (SCIMP), transcript variant 1, mRNA [NM_207103]                                          | NM_207103    |
| A_23_P30547    | -37.450264 | down | 1.57E-03 | 1.083E-05 | 7.519321  | 2.292417  | 1.7896895 | LCP2         | Homo sapiens lymphocyte cytosolic protein 2 (SH2 domain containing leukocyte protein of 76kDa) (LCP2), mRNA [NM_005565]                                | NM_005565    |
| A_23_P255444   | -4.7283983 | down | 4.32E-02 | 3.744E-03 | 4.2041306 | 1.9627789 | 2.3886375 | DAPP1        | Homo sapiens dual adaptor of phosphotyrosine and 3-phosphoinositides (DAPP1), mRNA [NM_014395]                                                         | NM_014395    |
| A_32_P140139   | -18.662628 | down | 4.33E-02 | 3.765E-03 | 9.263975  | 5.041895  | 1.9835631 | F13A1        | Homo sapiens coagulation factor XIII, A1 polypeptide (F13A1), mRNA [NM_000129]                                                                         | NM_000129    |
| A_23_P165136   | -12.545743 | down | 1.74E-03 | 1.650E-05 | 5.8573413 | 2.2082152 | 2.7203705 | LRR25        | Homo sapiens leucine rich repeat containing 25 (LRR25), mRNA [NM_145256]                                                                               | NM_145256    |
| A_33_P3489646  | -9.375611  | down | 1.62E-02 | 6.737E-04 | 8.059141  | 4.8302283 | 4.740722  | SP1          | Homo sapiens Spi-1 proto-oncogene (SP1), transcript variant 1, mRNA [NM_001080547]                                                                     | NM_001080547 |
| A_23_P46356    | -13.673977 | down | 6.11E-03 | 1.309E-04 | 6.4773536 | 2.7039926 | 4.67439   | TNFAIP8L2    | Homo sapiens tumor necrosis factor, alpha-induced protein 8-like 2 (TNFAIP8L2), mRNA [NM_024575]                                                       | NM_024575    |
| A_23_P167389   | -9.836843  | down | 1.58E-02 | 6.242E-04 | 8.406333  | 5.1081376 | 5.047123  | ARAP3        | Homo sapiens ArfGAP with RhoGAP domain, ankyrin repeat and PH domain 3 (ARAP3), mRNA [NM_022481]                                                       | NM_022481    |
| A_23_P103765   | -9.054872  | down | 2.48E-03 | 3.352E-05 | 4.9561377 | 1.7774435 | 1.759114  | FCER1A       | Homo sapiens Fc fragment of IgE, high affinity I, receptor for; alpha polypeptide (FCER1A), mRNA [NM_002001]                                           | NM_002001    |
| A_23_P38795    | -4.6965775 | down | 2.32E-02 | 1.266E-03 | 7.608864  | 5.377254  | 4.675023  | FPR1         | Homo sapiens formyl peptide receptor 1 (FPR1), transcript variant 2, mRNA [NM_002029]                                                                  | NM_002029    |
| A_23_P97141    | -36.660744 | down | 1.21E-02 | 3.809E-04 | 7.30524   | 2.109076  | 2.2348874 | RGS1         | Homo sapiens regulator of G-protein signaling 1 (RGS1), mRNA [NM_002922]                                                                               | NM_002922    |
| A_33_P3271635  | -12.753295 | down | 2.32E-02 | 1.252E-03 | 8.2282915 | 4.5554934 | 5.8125486 | HLA-DPB1     | Homo sapiens major histocompatibility complex, class II, DP beta 1 (HLA-DPB1), mRNA [NM_002121]                                                        | NM_002121    |
| A_24_P116535   | -6.0826826 | down | 1.30E-02 | 4.587E-04 | 8.046312  | 5.4416046 | 6.0412574 | MMP15        | Homo sapiens matrix metalloproteinase 15 (membrane-inserted) (MMP15), mRNA [NM_002428]                                                                 | NM_002428    |
| A_24_P202840   | -5.321192  | down | 4.71E-02 | 4.476E-03 | 4.4370546 | 2.0253053 | 2.6319134 | SIRPB2       | Homo sapiens signal-regulatory protein beta 2 (SIRPB2), transcript variant 1, mRNA [NM_001122962]                                                      | NM_001122962 |
| A_23_P136683   | -33.3854   | down | 1.57E-03 | 1.059E-05 | 7.400058  | 2.3389125 | 1.8644826 | HLA-DQB1     | Homo sapiens major histocompatibility complex, class II, DQ beta 1 (HLA-DQB1), transcript variant 2, mRNA [NM_001243961]                               | NM_001243961 |
| A_33_P3304170  | -7.179095  | down | 2.16E-02 | 1.082E-03 | 5.584837  | 2.741035  | 2.6249373 | PIK3CG       | Homo sapiens phosphatidylinositol-4,5-bisphosphate 3-kinase, catalytic subunit gamma (PIK3CG), transcript variant 1, mRNA [NM_002649]                  | NM_002649    |
| A_33_P3403576  | -31.26261  | down | 2.80E-02 | 1.806E-03 | 8.9291115 | 3.9627452 | 4.22223   | FCGR2C       | Homo sapiens Fc fragment of IgG, low affinity IIc, receptor for (CD32) (gene/pseudogene) (FCGR2C), transcript variant 1, mRNA [NM_201563]              | NM_201563    |
| A_33_P3271651  | -13.361881 | down | 1.80E-02 | 8.111E-04 | 10.023788 | 6.283737  | 4.7308073 | HLA-DPB1     | Homo sapiens major histocompatibility complex, class II, DP beta 1 (HLA-DPB1), mRNA [NM_002121]                                                        | NM_002121    |
| A_23_P124108   | -          | down | 1.57E-03 | 1.003E-05 | 6.1358724 | 2.272887  | 3.9242659 | ITGAM        | Homo sapiens integrin, alpha M (complement component 3 receptor 3 subunit) (ITGAM), transcript variant 2, mRNA [NM_000632]                             | NM_000632    |
| A_23_P85716    | -16.89412  | down | 2.62E-02 | 1.649E-03 | 8.500572  | 4.422123  | 5.7144947 | FCGR2A       | Homo sapiens Fc fragment of IgG, low affinity IIa, receptor (CD32) (FCGR2A), transcript variant 2, mRNA [NM_021642]                                    | NM_021642    |
| A_23_P217269   | -68.69325  | down | 2.32E-02 | 1.277E-03 | 9.602003  | 3.4999065 | 2.6209302 | VSIG4        | Homo sapiens V-set and immunoglobulin domain containing 4 (VSIG4), transcript variant 1, mRNA [NM_007268]                                              | NM_007268    |
| A_23_P72651    | -22.19549  | down | 1.65E-02 | 7.068E-04 | 6.7847033 | 2.3125088 | 3.4307234 | ECSCR        | Homo sapiens endothelial cell surface expressed chemotaxis and apoptosis regulator (ECSCR), transcript variant 1, mRNA [NM_001077693]                  | NM_001077693 |
| A_33_P3261953  | -2.2363958 | down | 4.00E-02 | 3.352E-03 | 4.3604217 | 3.1992462 | 4.342726  | LOC100996349 | Homo sapiens testis expressed 264 pseudogene (LOC100996349), non-coding RNA [NR_103470]                                                                | NR_103470    |
| A_33_P3215363  | -3.871501  | down | 4.57E-02 | 4.286E-03 | 4.03573   | 2.0828369 | 4.9140463 |              |                                                                                                                                                        |              |
| A_33_P3327617  | -25.179182 | down | 1.63E-02 | 6.829E-04 | 7.286284  | 2.6321242 | 5.027398  | FCGR2B       | Homo sapiens Fc fragment of IgG, low affinity IIb, receptor (CD32) (FCGR2B), transcript variant 3, mRNA [NM_001002274]                                 | NM_001002274 |

|                |            |      |          |           |           |           |           |                |                                                                                                                   |              |
|----------------|------------|------|----------|-----------|-----------|-----------|-----------|----------------|-------------------------------------------------------------------------------------------------------------------|--------------|
| A_23_P47410    | -7.110962  | down | 4.98E-02 | 5.018E-03 | 6.6533866 | 3.8233418 | 4.7823653 | ESAM           | Homo sapiens endothelial cell adhesion molecule (ESAM), mRNA [NM_138961]                                          | NM_138961    |
| A_23_P48088    | -3.6576712 | down | 4.92E-02 | 4.927E-03 | 5.6825094 | 3.811584  | 5.0110226 | CD27           | Homo sapiens CD27 molecule (CD27), mRNA [NM_001242]                                                               | NM_001242    |
| A_21_P0012145  | 3.3322854  | up   | 2.99E-02 | 2.044E-03 | 2.121267  | 3.857779  | 2.0364542 | lnc-SPTLC3-2   | LNCipedia lincRNA (lnc-SPTLC3-2), lincRNA [lnc-SPTLC3-2:1]                                                        |              |
| A_21_P0002073  | 2.7758617  | up   | 4.12E-02 | 3.495E-03 | 8.650891  | 10.123827 | 9.298629  |                | DB092709 TEST14 Homo sapiens cDNA clone TEST14042421 5', mRNA sequence [DB092709]                                 |              |
| A_33_P3404566  | 3.262678   | up   | 4.47E-02 | 4.073E-03 | 4.1476    | 5.853657  | 4.204044  |                |                                                                                                                   |              |
| A_22_P00018871 | 5.946908   | up   | 1.14E-03 | 4.657E-06 | 1.9343673 | 4.506507  | 3.9860222 | LINC01038      | Homo sapiens long intergenic non-protein coding RNA 1038 (LINC01038), long non-coding RNA [NR_125785]             |              |
| A_33_P3215848  | 5.6495337  | up   | 2.90E-02 | 1.942E-03 | 3.9538507 | 6.4519825 | 5.8248625 |                | Homo sapiens mRNA similar to collagen, type XVII, alpha 1 (cDNA clone IMAGE:5431129). [BC044628]                  | BC044628     |
| A_23_P88222    | 19.090704  | up   | 4.11E-04 | 2.778E-07 | 2.7889628 | 7.0437613 | 6.891835  | PLD4           | Homo sapiens phospholipase D family, member 4 (PLD4), mRNA [NM_138790]                                            | NM_138790    |
| A_19_P00807545 | 2.610417   | up   | 3.02E-02 | 2.072E-03 | 5.184612  | 6.568892  | 5.1232142 |                | crystallin, beta B2 pseudogene 1 [Source:HGNC Symbol;Acc:HGNC:2399] [ENST00000609513]                             |              |
| A_33_P3346508  | 9.346772   | up   | 1.74E-03 | 1.695E-05 | 5.5102873 | 8.7347555 | 8.290354  |                |                                                                                                                   |              |
| A_24_P461497   | 42.99051   | up   | 4.39E-04 | 9.189E-07 | 4.271331  | 9.697277  | 8.856716  |                |                                                                                                                   |              |
| A_24_P878388   | 2.785232   | up   | 1.19E-02 | 3.680E-04 | 11.386931 | 12.864729 | 12.515658 |                |                                                                                                                   |              |
| A_33_P3322125  | 2.1880224  | up   | 3.44E-02 | 2.684E-03 | 3.0574234 | 4.187051  | 3.517322  | DAZAP2         | Homo sapiens DAZ associated protein 2 (DAZAP2), transcript variant 6, mRNA [NM_001136269]                         | NM_001136269 |
| A_22_P00020157 | 2.5480125  | up   | 4.89E-02 | 4.836E-03 | 4.630368  | 5.9797406 | 5.5965424 | lnc-RAD1-1     | Homo sapiens cDNA FLJ43326 fis, clone NT2RI3001263. [AK125316]                                                    | AK125316     |
| A_23_P129144   | 10.700807  | up   | 1.23E-02 | 4.065E-04 | 2.463688  | 5.8833356 | 5.200577  | MYZAP          | Homo sapiens myocardial zonula adherens protein (MYZAP), transcript variant 1, mRNA [NM_001018100]                | NM_001018100 |
| A_24_P365349   | 10.079133  | up   | 3.18E-02 | 2.313E-03 | 2.0109096 | 5.344209  | 4.3731885 | CACNG7         | Homo sapiens calcium channel, voltage-dependent, gamma subunit 7 (CACNG7), mRNA [NM_031896]                       | NM_031896    |
| A_22_P00019433 | 2.1770298  | up   | 4.39E-02 | 3.850E-03 | 3.921835  | 5.044196  | 5.1350203 | lnc-SLC16A3-5  | LNCipedia lincRNA (lnc-SLC16A3-5), lincRNA [lnc-SLC16A3-5:1]                                                      | BX649099     |
| A_23_P19182    | 3.423824   | up   | 4.47E-02 | 4.003E-03 | 7.1975074 | 8.973116  | 9.940938  | REEP2          | Homo sapiens receptor accessory protein 2 (REEP2), transcript variant 2, mRNA [NM_016606]                         | NM_016606    |
| A_22_P00016387 | 2.3858495  | up   | 3.92E-02 | 3.222E-03 | 2.0571208 | 3.3116238 | 3.1157348 |                |                                                                                                                   |              |
| A_24_P58242    | 6.0031414  | up   | 2.47E-03 | 3.250E-05 | 4.630097  | 7.2158146 | 7.2349772 |                | ribosomal protein S15a pseudogene 25 [Source:HGNC Symbol;Acc:HGNC:36848] [ENST00000489168]                        |              |
| A_33_P3288329  | 13.219042  | up   | 3.61E-02 | 2.869E-03 | 3.9246938 | 7.6492395 | 6.7581205 | SORBS1         | Homo sapiens sorbin and SH3 domain containing 1 (SORBS1), transcript variant 8, mRNA [NM_001290294]               | NM_001290294 |
| A_23_P29769    | 3.2862542  | up   | 1.58E-02 | 6.303E-04 | 7.9976616 | 9.714106  | 9.221131  | VWTR1          | Homo sapiens VW domain containing transcription regulator 1 (VWTR1), transcript variant 1, mRNA [NM_015472]       | NM_015472    |
| A_22_P00025102 | 133.1919   | up   | 4.39E-04 | 1.007E-06 | 1.7562649 | 8.813627  | 7.2147617 |                |                                                                                                                   |              |
| A_33_P3355418  | 11.666827  | up   | 1.12E-02 | 3.231E-04 | 2.491573  | 6.0359135 | 4.6004763 | AGBL1          | Homo sapiens ATP/GTP binding protein-like 1 (AGBL1), mRNA [NM_152336]                                             | NM_152336    |
| A_21_P0010611  | 5.841431   | up   | 3.15E-02 | 2.250E-03 | 2.8043466 | 5.3506684 | 5.0627804 | XLOC_I2_000900 | BROAD Institute lincRNA (XLOC_I2_000900), lincRNA [TCONS_I2_00001221]                                             |              |
| A_23_P59099    | 2.9181006  | up   | 1.62E-02 | 6.638E-04 | 4.849109  | 6.394139  | 6.3548408 | OR11A1         | Homo sapiens olfactory receptor, family 11, subfamily A, member 1 (OR11A1), mRNA [NM_013937]                      | NM_013937    |
| A_21_P0006279  | 2.357354   | up   | 1.64E-02 | 6.884E-04 | 3.9686623 | 5.2058306 | 4.539003  | lnc-TRPM6-4    | LNCipedia lincRNA (lnc-TRPM6-4), lincRNA [lnc-TRPM6-4:1]                                                          |              |
| A_19_P00807614 | 2.2930977  | up   | 2.73E-02 | 1.733E-03 | 3.2969725 | 4.4942703 | 3.5805511 | lnc-WDR7-8     | LNCipedia lincRNA (lnc-WDR7-8), lincRNA [lnc-WDR7-8:1]                                                            |              |
| A_23_P26072    | 4.661514   | up   | 7.86E-03 | 2.009E-04 | 3.4811363 | 5.701935  | 5.582512  |                | Homo sapiens PRO1914 mRNA, complete cds. [AF118084]                                                               | AF118084     |
| A_22_P00023095 | 4.1901894  | up   | 3.98E-02 | 3.283E-03 | 2.5821211 | 4.6491365 | 4.3700504 | lnc-KIF15-1    | DB095685 TEST14 Homo sapiens cDNA clone TEST14046411 5', mRNA sequence [DB095685]                                 | DB095685     |
| A_22_P00020557 | 2.6329703  | up   | 5.09E-03 | 9.956E-05 | 4.929719  | 6.3264103 | 6.400551  | lnc-ACO10536-1 | Q9SCR0_ARATH (Q9SCR0) Scarecrow-like 7 (SCL7), partial (4%) [THC2724708]                                          |              |
| A_33_P3293009  | 3.5156019  | up   | 2.42E-02 | 1.434E-03 | 4.7589025 | 6.5726743 | 6.1105943 | NKAIN4         | Homo sapiens Na <sup>+</sup> /K <sup>+</sup> transporting ATPase interacting 4 (NKAIN4), mRNA [NM_152864]         | NM_152864    |
| A_21_P0013524  | 2.6647136  | up   | 2.90E-02 | 1.951E-03 | 2.7216072 | 4.1355877 | 3.1587543 | OTUD6B-AS1     | PREDICTED: Homo sapiens uncharacterized LOC100506365 (GS1-25119), transcript variant X3, ncRNA [XR_432334]        |              |
| A_19_P00318909 | 7.7862563  | up   | 1.37E-02 | 5.012E-04 | 2.8905792 | 5.851509  | 5.3621373 | XLOC_I2_010751 | BROAD Institute lincRNA (XLOC_I2_010751), lincRNA [TCONS_I2_00020645]                                             |              |
| A_22_P00009753 | 2.34451    | up   | 1.13E-02 | 3.276E-04 | 2.618812  | 3.8480985 | 3.8333719 |                | 603295654F1 NIH_MGC_96 Homo sapiens cDNA clone IMAGE:5315076 5', mRNA sequence [BI668294]                         | BI668294     |
| A_22_P00010667 | 3.7759075  | up   | 2.59E-02 | 1.614E-03 | 5.5164185 | 7.433242  | 7.2591505 | lnc-NES-1      | LNCipedia lincRNA (lnc-NES-1), lincRNA [lnc-NES-1:1]                                                              |              |
| A_21_P0008369  | 26.225376  | up   | 1.46E-02 | 5.663E-04 | 2.3623588 | 7.0752506 | 6.770934  | lnc-GPR65-1    | LNCipedia lincRNA (lnc-GPR65-1), lincRNA [lnc-GPR65-1:1]                                                          |              |
| A_23_P201939   | 3.3036308  | up   | 3.27E-02 | 2.423E-03 | 3.991868  | 5.7159204 | 6.4413757 | PPM1J          | Homo sapiens protein phosphatase, Mg2+/Mn2+ dependent, 1J (PPM1J), mRNA [NM_005167]                               | NM_005167    |
| A_22_P00019426 | 4.7447157  | up   | 4.58E-02 | 4.312E-03 | 3.4016252 | 5.647947  | 5.041812  | lnc-RIC8A-1    | LNCipedia lincRNA (lnc-RIC8A-1), lincRNA [lnc-RIC8A-1:1]                                                          |              |
| A_19_P00317913 | 5.979969   | up   | 2.47E-02 | 1.495E-03 | 2.317499  | 4.897637  | 4.884096  | HLA-F-AS1      | Homo sapiens HLA-F antisense RNA 1 (HLA-F-AS1), transcript variant 2, long non-coding RNA [NR_026973]             | NR_026973    |
| A_19_P00322890 | 2.8143983  | up   | 4.00E-02 | 3.340E-03 | 3.4582486 | 4.951075  | 2.6780293 |                |                                                                                                                   |              |
| A_21_P0006199  | 5.0319824  | up   | 2.90E-02 | 1.947E-03 | 2.949611  | 5.280738  | 3.815021  | lnc-ZNF462-1   | LNCipedia lincRNA (lnc-ZNF462-1), lincRNA [lnc-ZNF462-1:3]                                                        |              |
| A_22_P00019317 | 4.1526365  | up   | 7.35E-03 | 1.714E-04 | 5.5697575 | 7.623785  | 7.377725  | lnc-NMNAT3-3   | LNCipedia lincRNA (lnc-NMNAT3-3), lincRNA [lnc-NMNAT3-3:2]                                                        |              |
| A_23_P132856   | 39.404804  | up   | 4.39E-04 | 9.815E-07 | 3.1768951 | 8.477195  | 8.296629  | NRROS          | Homo sapiens negative regulator of reactive oxygen species (NRROS), mRNA [NM_198565]                              | NM_198565    |
| A_22_P00009805 | 8.732588   | up   | 2.36E-02 | 1.365E-03 | 2.0221913 | 5.1486006 | 1.791163  |                |                                                                                                                   |              |
| A_21_P0004989  | 6.6942263  | up   | 2.07E-02 | 1.018E-03 | 2.7766778 | 5.519595  | 4.259922  | lnc-GMDS-1     | LNCipedia lincRNA (lnc-GMDS-1), lincRNA [lnc-GMDS-1:1]                                                            |              |
| A_24_P92267    | 117.67072  | up   | 7.79E-04 | 2.185E-06 | 2.870093  | 9.748705  | 9.02667   |                |                                                                                                                   |              |
| A_33_P3213685  | 2.2339394  | up   | 4.92E-02 | 4.901E-03 | 2.1939337 | 3.3535237 | 1.8346009 | CAB39L         | Homo sapiens calcium binding protein 39-like (CAB39L), transcript variant 4, mRNA [NM_001287339]                  | NM_001287339 |
| A_23_P23443    | 2.3167999  | up   | 3.45E-02 | 2.701E-03 | 10.754271 | 11.966404 | 11.655912 | EFHD2          | Homo sapiens EF-hand domain family, member D2 (EFHD2), mRNA [NM_024329]                                           | NM_024329    |
| A_24_P772488   | 5.9351215  | up   | 3.35E-02 | 2.537E-03 | 2.7316477 | 5.3009253 | 4.6594167 | PLXNA4         | Homo sapiens plexin A4 (PLXNA4), transcript variant 1, mRNA [NM_020911]                                           | NM_020911    |
| A_22_P00020378 | 2.2046416  | up   | 3.18E-02 | 2.292E-03 | 2.412814  | 3.553358  | 3.171226  |                | Homo sapiens fusion RNA for switch circle transcript (lgamma2 - Cmu) in t(11;14) mantle cell lymphoma. [AJ617578] | AJ617578     |
| A_32_P466514   | 2.077722   | up   | 7.10E-03 | 1.628E-04 | 5.8978157 | 6.9528184 | 6.5298705 | IRF2BPL        | Homo sapiens interferon regulatory factor 2 binding protein-like (IRF2BPL), mRNA [NM_024496]                      | NM_024496    |
| A_22_P00000718 | 3.484222   | up   | 2.36E-02 | 1.379E-03 | 2.2457209 | 4.0465574 | 4.1775093 | lnc-ADAMTS18-1 | LNCipedia lincRNA (lnc-ADAMTS18-1), lincRNA [lnc-ADAMTS18-1:1]                                                    |              |
| A_21_P0014129  | 4.7097425  | up   | 4.07E-02 | 3.438E-03 | 2.4652128 | 4.700861  | 3.6792235 | LINC00578      | Homo sapiens long intergenic non-protein coding RNA 578 (LINC00578), long non-coding RNA [NR_047568]              | NR_047568    |

|                |           |    |          |           |           |           |           |                                                      |                                                                                                                                    |              |
|----------------|-----------|----|----------|-----------|-----------|-----------|-----------|------------------------------------------------------|------------------------------------------------------------------------------------------------------------------------------------|--------------|
| A_23_P383258   | 7.671959  | up | 2.02E-02 | 9.797E-04 | 1.7330625 | 4.6726575 | 2.8554714 | GDA                                                  | Homo sapiens guanine deaminase (GDA), transcript variant 2, mRNA [NM_004293]                                                       | NM_004293    |
| A_23_P368740   | 3.6407819 | up | 4.92E-02 | 4.946E-03 | 6.1546097 | 8.018858  | 6.80281   | HDAC10                                               | Homo sapiens histone deacetylase 10 (HDAC10), transcript variant 1, mRNA [NM_032019]                                               | NM_032019    |
| A_23_P123164   | 5.783192  | up | 1.78E-02 | 7.961E-04 | 3.1745796 | 5.7064457 | 5.047138  | OR6W1P                                               | Homo sapiens olfactory receptor, family 6, subfamily W, member 1 pseudogene (OR6W1P), non-coding RNA [NR_002140]                   | NR_002140    |
| A_23_P257649   | 11.458492 | up | 2.32E-02 | 1.298E-03 | 5.320437  | 8.838782  | 7.8562336 | RBP1                                                 | Homo sapiens retinol binding protein 1, cellular (RBP1), transcript variant 1, mRNA [NM_002899]                                    | NM_002899    |
| A_33_P3253892  | 2.1581197 | up | 3.09E-02 | 2.145E-03 | 1.8804418 | 2.9902167 | 2.8358524 |                                                      |                                                                                                                                    |              |
| A_23_P7048     | 10.464686 | up | 4.30E-02 | 3.719E-03 | 2.2061675 | 5.5936246 | 4.447854  | LINC01587                                            | Homo sapiens long intergenic non-protein coding RNA 1587 (LINC01587), transcript variant 2, long non-coding RNA [NR_126518]        | NR_126518    |
| A_33_P3257784  | 4.876127  | up | 2.90E-02 | 1.915E-03 | 5.2292395 | 7.514975  | 6.950926  | TSPAN17                                              | Homo sapiens tetraspanin 17 (TSPAN17), transcript variant 1, mRNA [NM_012171]                                                      | NM_012171    |
| A_22_P00004895 | 3.8380644 | up | 3.15E-02 | 2.261E-03 | 2.3484523 | 4.288831  | 3.081831  |                                                      |                                                                                                                                    |              |
| A_24_P228717   | 5.4685345 | up | 3.75E-03 | 6.024E-05 | 5.7471204 | 8.198275  | 8.136852  | RAC2                                                 | Homo sapiens ras-related C3 botulinum toxin substrate 2 (rho family, small GTP binding protein Rac2) (RAC2), mRNA [NM_002872]      | NM_002872    |
| A_21_P0009305  | 3.065369  | up | 3.59E-03 | 5.477E-05 | 5.0658555 | 6.681916  | 6.403196  | lnc-MFAP4-4                                          | LNCipedia lincRNA (lnc-MFAP4-4), lincRNA [lnc-MFAP4-4:1]                                                                           |              |
| A_23_P412476   | 5.078423  | up | 2.86E-02 | 1.870E-03 | 2.537288  | 4.8816686 | 5.087158  | GREB1                                                | Homo sapiens growth regulation by estrogen in breast cancer 1 (GREB1), transcript variant c, mRNA [NM_148903]                      | NM_148903    |
| A_22_P00012461 | 2.7294452 | up | 1.65E-02 | 7.101E-04 | 2.3804312 | 3.8290389 | 3.6655369 | lnc-PRR14-1                                          | LNCipedia lincRNA (lnc-PRR14-1), lincRNA [lnc-PRR14-1:1]                                                                           |              |
| A_32_P494620   | 12.494072 | up | 3.88E-03 | 6.434E-05 | 2.236792  | 5.789964  | 5.4176073 | LHFP5L                                               | Homo sapiens lipoma HMGIC fusion partner-like 5 (LHFP5L), mRNA [NM_182548]                                                         | NM_182548    |
| A_33_P3420416  | 3.3692245 | up | 1.37E-02 | 5.021E-04 | 5.2378306 | 6.9902472 | 6.562834  | LGALS9                                               | Homo sapiens lectin, galactoside-binding, soluble, 9 (LGALS9), transcript variant 2, mRNA [NM_002308]                              | NM_002308    |
| A_21_P0000710  | 7.7853985 | up | 1.74E-03 | 1.695E-05 | 2.0931165 | 5.0538874 | 5.4320097 | HMGA1P7                                              | Homo sapiens high mobility group AT-hook 1 pseudogene 7 (HMGA1P7), non-coding RNA [NR_037938]                                      | NR_037938    |
| A_24_P74559    | 16.083923 | up | 4.66E-02 | 4.397E-03 | 3.0770853 | 7.0846324 | 6.3748426 | CYTH4                                                | Homo sapiens cytohesin 4 (CYTH4), mRNA [NM_013385]                                                                                 | NM_013385    |
| A_22_P00018081 | 2.7510715 | up | 2.31E-02 | 1.223E-03 | 3.2176487 | 4.6776423 | 4.3462353 | LOC101929464                                         | Homo sapiens uncharacterized LOC101929464 (LOC101929464), long non-coding RNA [NR_125978]                                          | NR_125978    |
| A_24_P940125   | 3.0624576 | up | 3.13E-02 | 2.195E-03 | 7.3938694 | 9.008559  | 8.831198  | CNOT6                                                | Homo sapiens CCR4-NOT transcription complex, subunit 6 (CNOT6), mRNA [NM_001303241]                                                | NM_001303241 |
| A_21_P0008066  | 2.2563584 | up | 1.36E-02 | 4.920E-04 | 3.0515296 | 4.225526  | 3.0211074 | lnc-OLFM4-2                                          | LNCipedia lincRNA (lnc-OLFM4-2), lincRNA [lnc-OLFM4-2:1]                                                                           |              |
| A_21_P0000492  | 2.533174  | up | 3.18E-02 | 2.318E-03 | 11.481149 | 12.822095 | 11.65675  | SNAR-F                                               | Homo sapiens small ILF3/NF90-associated RNA F (SNAR-F), small nuclear RNA [NR_004384]                                              | NR_004384    |
| A_21_P0001512  | 2.0807045 | up | 2.47E-03 | 3.125E-05 | 1.8863164 | 2.9433885 | 3.8345582 | PREDICTED: Homo sapiens uncharacterized LOC101930559 | PREDICTED: Homo sapiens uncharacterized LOC101930559 (LOC101930559), ncRNA [XR_425171]                                             |              |
| A_21_P0007803  | 8.884324  | up | 1.45E-02 | 5.443E-04 | 2.4232943 | 5.5745564 | 5.3131495 | lnc-TMEM132D-2                                       | LNCipedia lincRNA (lnc-TMEM132D-2), lincRNA [lnc-TMEM132D-2:1]                                                                     |              |
| A_33_P3336462  | 2.4863243 | up | 4.92E-02 | 4.897E-03 | 4.799469  | 6.1134834 | 4.878437  |                                                      | Homo sapiens cDNA FLJ41306 fis, clone BRAMY2042549. [AK123300]                                                                     | AK123300     |
| A_33_P3286616  | 2.3660972 | up | 4.70E-02 | 4.460E-03 | 6.759497  | 8.002007  | 7.613921  | IRAK1                                                | Homo sapiens interleukin-1 receptor-associated kinase 1 (IRAK1), transcript variant 1, mRNA [NM_001569]                            | NM_001569    |
| A_23_P45338    | 3.3386595 | up | 1.33E-02 | 4.717E-04 | 1.9574516 | 3.6967206 | 3.1297889 | EFHC2                                                | Homo sapiens EF-hand domain (C-terminal) containing 2 (EFHC2), mRNA [NM_025184]                                                    | NM_025184    |
| A_22_P00016489 | 2.3329341 | up | 7.49E-03 | 1.777E-04 | 4.3653407 | 5.5874863 | 5.1740303 | LOC102724715                                         | PREDICTED: Homo sapiens uncharacterized LOC102724715 (LOC102724715), ncRNA [XR_424811]                                             | XR_424811    |
| A_33_P3383861  | 4.655555  | up | 1.62E-02 | 6.615E-04 | 2.63656   | 4.855513  | 4.7666225 | LOC646471                                            | Homo sapiens uncharacterized LOC646471 (LOC646471), long non-coding RNA [NR_024498]                                                | NR_024498    |
| A_33_P3258349  | 2.281593  | up | 4.66E-03 | 8.672E-05 | 1.9420912 | 3.1321328 | 2.2731915 | LOC644145                                            | Homo sapiens exocyst complex component 1 pseudogene (LOC644145), non-coding RNA [NR_003935]                                        | NR_003935    |
| A_21_P0010095  | 146.7572  | up | 4.39E-04 | 6.575E-07 | 1.877927  | 9.075214  | 7.6623445 | lnc-CEBPB-6                                          | LNCipedia lincRNA (lnc-CEBPB-6), lincRNA [lnc-CEBPB-6:1]                                                                           |              |
| A_33_P3393801  | 15.849773 | up | 7.86E-03 | 2.025E-04 | 3.112498  | 7.0988884 | 6.622931  | PDZK1IP1                                             | Homo sapiens PDZK1 interacting protein 1 (PDZK1IP1), mRNA [NM_005764]                                                              | NM_005764    |
| A_23_P202071   | 15.37133  | up | 2.84E-02 | 1.847E-03 | 4.5045166 | 8.446687  | 7.8114076 | CELF2                                                | Homo sapiens CUGBP, Elav-like family member 2 (CELF2), transcript variant 3, mRNA [NM_001025077]                                   | NM_001025077 |
| A_33_P3405429  | 2.455445  | up | 2.02E-02 | 9.909E-04 | 2.5630693 | 3.8590539 | 3.1144032 | VWA5B1                                               | von Willebrand factor A domain containing 5B1 [Source:HGNC Symbol;Acc:HGNC:26538] [ENST00000473325]                                | AK125833     |
| A_19_P00805452 | 3.5441072 | up | 4.85E-02 | 4.778E-03 | 4.325754  | 6.1511765 | 4.6590147 | XLOC_I2_010558                                       | BROAD Institute lincRNA (XLOC_I2_010558), lincRNA [TCONS_I2_00020391]                                                              |              |
| A_21_P0010013  | 4.759893  | up | 4.41E-02 | 3.924E-03 | 2.3715541 | 4.6224833 | 3.5313966 | lnc-FOXA2-5                                          | LNCipedia lincRNA (lnc-FOXA2-5), lincRNA [lnc-FOXA2-5:1]                                                                           |              |
| A_33_P3316953  | 6.369514  | up | 2.51E-02 | 1.534E-03 | 1.7852294 | 4.456413  | 4.0258746 | RBFOX3                                               | Homo sapiens RNA binding protein, fox-1 homolog (C. elegans) 3 (RBFOX3), mRNA [NM_001082575]                                       | NM_001082575 |
| A_33_P3279820  | 3.2992637 | up | 1.72E-02 | 7.581E-04 | 4.1282396 | 5.8503838 | 6.023707  |                                                      |                                                                                                                                    |              |
| A_24_P409519   | 2.018356  | up | 2.31E-02 | 1.212E-03 | 1.7871389 | 2.8003197 | 2.5319307 | PTPN5                                                | Homo sapiens protein tyrosine phosphatase, non-receptor type 5 (striatum-enriched) (PTPN5), transcript variant 1, mRNA [NM_006906] | NM_006906    |
| A_22_P00004509 | 8.620757  | up | 1.74E-03 | 1.392E-05 | 2.1673658 | 5.2751803 | 4.655482  | lnc-CPT2-4                                           | LNCipedia lincRNA (lnc-CPT2-4), lincRNA [lnc-CPT2-4:1]                                                                             |              |
| A_22_P00005942 | 5.906219  | up | 4.30E-02 | 3.705E-03 | 4.0602    | 6.622435  | 6.126542  | lnc-EXOC3L4-1                                        | CR736179 Soares_fetal_lung_NbHL19W Homo sapiens cDNA clone IMAGp971A1684 ; IMAGE:1952157 5', mRNA sequence [CR736179]              | CR736179     |
| A_22_P00005443 | 18.053059 | up | 5.82E-03 | 1.216E-04 | 2.5595188 | 6.7336903 | 6.4018784 | lnc-DUSP1-2                                          | DB065448 TESTI4 Homo sapiens cDNA clone TESTI4006501 5', mRNA sequence [DB065448]                                                  | DB065448     |
| A_33_P3380751  | 2.4584491 | up | 1.46E-02 | 5.650E-04 | 5.7875023 | 7.085251  | 6.8084297 | ST8SIA1                                              | Homo sapiens ST8 alpha-N-acetylneuraminidase alpha-2,8-sialyltransferase 1 (ST8SIA1), mRNA [NM_003034]                             | NM_003034    |
| A_23_P87310    | 15.263365 | up | 1.00E-02 | 2.831E-04 | 2.6774354 | 6.6094365 | 5.9871864 | LMO1                                                 | Homo sapiens LIM domain only 1 (rhombotin 1) (LMO1), transcript variant 1, mRNA [NM_002315]                                        | NM_002315    |
| A_21_P0014220  | 2.091639  | up | 3.80E-02 | 3.103E-03 | 2.0982833 | 3.1629171 | 1.8546379 |                                                      | carbonic anhydrase XIII [Source:HGNC Symbol;Acc:HGNC:14914] [ENST00000518392]                                                      | XR_108904    |
| A_21_P0013342  | 2.818014  | up | 2.84E-02 | 1.839E-03 | 2.2815654 | 3.7762442 | 4.06146   | CCZ1                                                 | Homo sapiens CCZ1 vacuolar protein trafficking and biogenesis associated homolog (S. cerevisiae) (CCZ1), mRNA [NM_015622]          | NM_015622    |
| A_22_P00007142 | 3.3187554 | up | 3.32E-02 | 2.485E-03 | 10.519051 | 12.249693 | 11.919773 | QBLCA6_ARATH (Q8LCA6)                                | Transcriptional coactivator-like protein, partial (7%) [THC2683788]                                                                | BC033528     |
| A_33_P3343577  | 2.414751  | up | 4.84E-02 | 4.718E-03 | 1.9467041 | 3.2185786 | 2.7416    |                                                      | T cell receptor beta variable 10-3 [Source:HGNC Symbol;Acc:HGNC:12179] [ENST00000611462]                                           | AB305952     |
| A_33_P3354940  | 3.3066874 | up | 4.84E-02 | 4.690E-03 | 5.0031548 | 6.4113398 | 6.4113398 | CSF1                                                 | Homo sapiens colony stimulating factor 1 (macrophage) (CSF1), transcript variant 1, mRNA [NM_000757]                               | NM_000757    |
| A_21_P0013026  | 5.5603094 | up | 4.39E-04 | 9.863E-07 | 1.9420512 | 4.4172163 | 4.0169835 | XLOC_I2_012578                                       | BROAD Institute lincRNA (XLOC_I2_012578), lincRNA [TCONS_I2_00024254]                                                              |              |
| A_21_P0007452  | 4.010085  | up | 2.67E-02 | 1.686E-03 | 3.4647996 | 5.4684324 | 5.2063265 | lnc-AP000679.2.1-1                                   | LNCipedia lincRNA (lnc-AP000679.2.1-1), lincRNA [lnc-AP000679.2.1-1:1]                                                             |              |
| A_32_P25514    | 4.6331387 | up | 2.39E-03 | 2.905E-05 | 3.6643367 | 5.8763266 | 5.79671   | GABRG2                                               | Homo sapiens gamma-aminobutyric acid (GABA) A receptor, gamma 2 (GABRG2), transcript variant 1, mRNA [NM_198904]                   | NM_198904    |
| A_21_P0009890  | 3.3435168 | up | 1.45E-02 | 5.391E-04 | 4.635953  | 6.3773193 | 6.0573063 |                                                      |                                                                                                                                    |              |

|               |           |    |          |           |          |           |           |              |                                                                                                                        |              |
|---------------|-----------|----|----------|-----------|----------|-----------|-----------|--------------|------------------------------------------------------------------------------------------------------------------------|--------------|
| A_23_P141035  | 2.9563332 | up | 4.47E-02 | 4.014E-03 | 5.151186 | 6.714995  | 5.750703  | CHST4        | Homo sapiens carbohydrate (N-acetylglucosamine 6-O) sulfotransferase 4 (CHST4), transcript variant 1, mRNA [NM_005769] | NM_005769    |
| A_21_P0014280 | 7.5137196 | up | 2.19E-02 | 1.113E-03 | 2.914421 | 5.8239484 | 6.084383  | LOC100128276 | Homo sapiens cDNA FLJ43282 fis, clone LIVER2007415, [AK125272]                                                         | AK125272     |
| A_23_P353614  | 2.9199715 | up | 4.41E-02 | 3.907E-03 | 4.287288 | 5.8332424 | 6.814702  | C8orf46      | Homo sapiens chromosome 8 open reading frame 46 (C8orf46), mRNA [NM_152765]                                            | NM_152765    |
| A_24_P136094  | 2.6014712 | up | 4.27E-02 | 3.669E-03 | 5.734892 | 7.1142197 | 6.4612913 | CCDC88C      | Homo sapiens coiled-coil domain containing 88C (CCDC88C), mRNA [NM_001080414]                                          | NM_001080414 |

**Supplementary Table 4. Most relevant networks involving the genes that are deregulated in PDX *vs.* primary OS tumors**

| <b>Network name</b>                                                             | <b>Processes</b>                                                                                                                                                                                                                                                                                                                                                                                                 | <b>Size</b> | <b>Target</b> | <b>Pathways</b> | <b>p-Value</b> | <b>zScore</b> | <b>gScore</b> |
|---------------------------------------------------------------------------------|------------------------------------------------------------------------------------------------------------------------------------------------------------------------------------------------------------------------------------------------------------------------------------------------------------------------------------------------------------------------------------------------------------------|-------------|---------------|-----------------|----------------|---------------|---------------|
| <b>PU.1,<br/>MANR,<br/>CD163,<br/>C1qRp,<br/>HLA-DQB1</b>                       | immune response (83.7%),<br>defense response (79.6%),<br>immune system process (89.8%),<br>regulation of immune system process (77.6%),<br>positive regulation of immune system process (69.4%)                                                                                                                                                                                                                  | 50          | 25            | 1               | 8.38E-56       | 83.72         | 84.97         |
| <b>VEGFR-2,<br/>VEGFR-1,<br/>COX-1 (PTGS1),<br/>CSF2RA,<br/>NF-AT1 (NFATC2)</b> | response to oxygen-containing compound (86.0%),<br>intracellular signal transduction (81.4%),<br>positive regulation of protein phosphorylation (69.8%),<br>response to organic substance (95.3%),<br>positive regulation of phosphorylation (69.8%)                                                                                                                                                             | 59          | 4             | 48              | 2.47E-06       | 12.88         | 72.88         |
| <b>c-Jun,<br/>H2-Ab-1</b>                                                       | antigen processing and presentation of peptide or polysaccharide antigen via MHC class II (89.6%),<br>antigen processing and presentation of exogenous peptide antigen via MHC class II (83.3%),<br>antigen processing and presentation of peptide antigen via MHC class II (83.3%),<br>antigen processing and presentation (89.6%),<br>antigen processing and presentation of exogenous peptide antigen (83.3%) | 50          | 13            | 0               | 1.40E-29       | 60.36         | 60.36         |

**Supplementary Table 5. Enrichment by Pathway Maps.**

| Maps                                                                       | In Data | Total | p-value     | FDR         | Network Objects from Active Data                                                                                                                   |
|----------------------------------------------------------------------------|---------|-------|-------------|-------------|----------------------------------------------------------------------------------------------------------------------------------------------------|
| Immune response_Antigen presentation by MHC class I: cross-presentation    | 14      | 99    | 1.15731E-10 | 5.48564E-08 | HSP70, TLR7, VAMP8, VAV-1, MANR, gp91-phox, SREC-I, Fc epsilon RI gamma, HSPA1A, Fc gamma RII alpha, p47-phox, Rac2, DAP12, CD74                   |
| Inhibition of neutrophil migration by proresolving lipid mediators in COPD | 11      | 71    | 4.5857E-09  | 1.08681E-06 | p38 MAPK, alpha-M/beta-2 integrin, VAV-1, PECAM1, CD34, PI3K cat class IB (p110-gamma), Rac2, FPR, PTAFR, PLC-beta2, ITGB2                         |
| Cell adhesion_Integrin inside-out signaling in neutrophils                 | 11      | 77    | 1.11167E-08 | 1.75644E-06 | p38 MAPK, alpha-M/beta-2 integrin, PI3K cat class IB (p110-gamma), PREL1, Slp76, DAP12, FPR, PTAFR, PLC-beta2, ITGB2, SLAP-130(ADAP)               |
| Immune response_Antigen presentation by MHC class II                       | 11      | 118   | 9.62545E-07 | 0.000114062 | MHC class II, MHC class II alpha chain, p38 MAPK, HLA-DM, PSD4, HCLS1, Fc gamma RII beta, MHC class II beta chain, MANR, Fc epsilon RI gamma, CD74 |
| Oxidative stress_Activation of NADPH oxidase                               | 8       | 59    | 1.81236E-06 | 0.000154941 | p38 MAPK, VAV-1, gp91-phox, PI3K cat class IB (p110-gamma), p40-phox, p47-phox, Rac2, PLC-beta                                                     |
| Immune response_PIP3 signaling in B lymphocytes                            | 7       | 42    | 1.96128E-06 | 0.000154941 | DAPP1, VAV-1, Fc gamma RII beta, PI3K cat class IB (p110-gamma), CD45, PLC-beta, p90Rsk                                                            |
| Role of cell adhesion in vaso-occlusion in Sickle cell disease             | 7       | 43    | 2.31465E-06 | 0.000156735 | alpha-M/beta-2 integrin, ITGAM, PECAM1, CD14, Fc gamma RII alpha, CD45, ITGB2                                                                      |
| Oxidative stress_Role of IL-8 signaling pathway in respiratory burst       | 7       | 48    | 4.98048E-06 | 0.000295093 | p38 MAPK, gp91-phox, PI3K cat class IB (p110-gamma), p40-phox, p47-phox, Rac2, PLC-beta2                                                           |
| Rheumatoid arthritis (general schema)                                      | 7       | 50    | 6.59615E-06 | 0.000347397 | MHC class II, CD2, HLA-DRB1, HLA-DRB, MHC class II beta chain, HLA-DRB4, CSF1                                                                      |
| Immune response_IL-5 signaling via PI3K, MAPK and NF-kB                    | 8       | 76    | 1.25429E-05 | 0.000594532 | p38 MAPK, alpha-M/beta-2 integrin, ITGAM, Fc gamma RII beta, Fc gamma RII alpha, p47-phox, PTAFR, ITGB2                                            |



## Supplementary Figure Legends

### Supplementary Figure 1.

Comparison of PDX growth in two immunodeficient mouse strains. The same *in vivo* passage of six OS and three EW was implanted in one NSG and one RGKO mouse. Each bar represents the mean tumor latency in weeks  $\pm$  SEM. n.s., not significant by the Student's paired *t* test ( $p=0.371$  for OS and  $p=0.326$  for EW).

### Supplementary Figure 2.

Unsupervised Principal Component Analysis of OS (blue) and EW (red) including clinical samples (squares), PDX (circles) and *in vitro* cultures (triangles). Parameters: column indices= [1-20], pruning option= [numPrincipalComponents, [4]], mean centered=true, scale=true, 3D scores=true, PCA on=Columns.

# Supplementary Figure 1

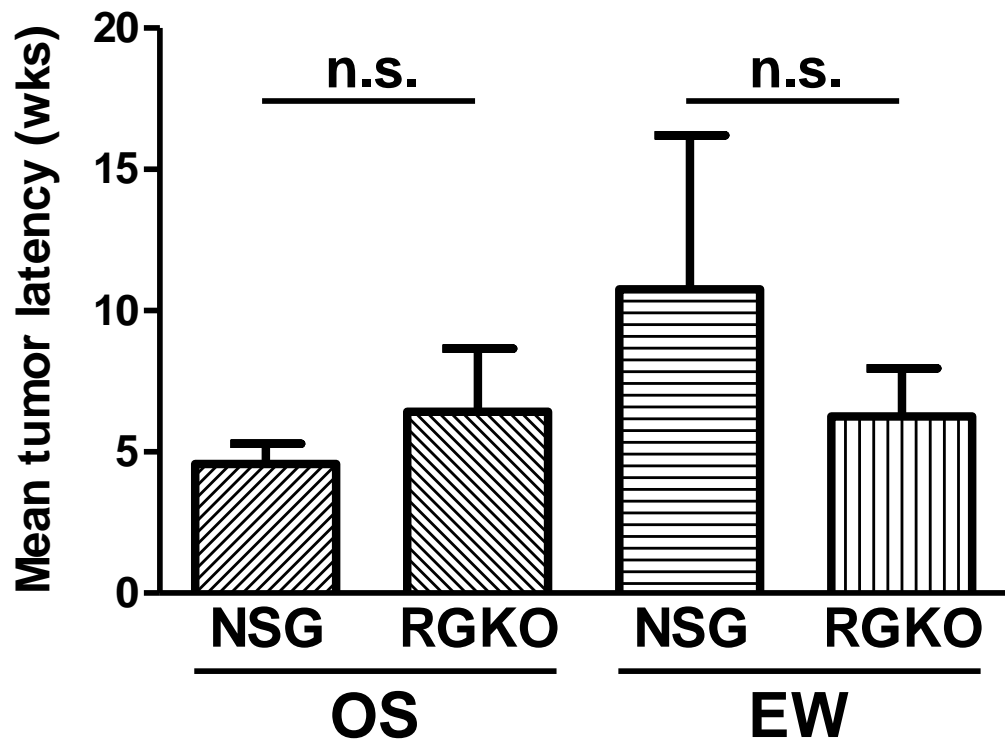

Supplement: 41598_2019_48634_MOESM1_ESM.pdf [file 41598_2019_48634_MOESM1_ESM.pdf]
